# Supplementary material for: Spatial and temporal patterns of stream nutrient limitation in an Arctic catchment
Source: Springer Nature journal article supplement (doi:10.1007/s10750-023-05178-7), 2023-03-13
Supplement: 10750_2023_5178_MOESM9_ESM.xlsx [file 10750_2023_5178_MOESM9_ESM.xlsx]

## Sheet: Chla
Deployment	Date	Treatment	Chla	Chla.RR	log(RRx)	DOC	DIN	SRP	TP	DPF	meanT	Depth
D1	2018-03-28	A	0.163178	1	0	1.31607	197.311	4.203	5.57642	0.177813	0.336354	0.183
D1	2018-03-28	A	0.097907	1	0	1.31607	197.311	4.203	5.57642	0.177813	0.336354	0.183
D1	2018-03-28	A	0.0326357	1	0	1.31607	197.311	4.203	5.57642	0.177813	0.336354	0.183
D1	2018-03-28	A	0.0489535	1	0	1.31607	197.311	4.203	5.57642	0.177813	0.336354	0.183
D1	2018-03-28	A	0.179496	1	0	1.31607	197.311	4.203	5.57642	0.177813	0.336354	0.183
D1	2018-03-28	N	0.114225	1.09375	0.0389181	1.31607	197.311	4.203	5.57642	0.177813	0.336354	0.183
D1	2018-03-28	N	0.130543	1.25	0.09691	1.31607	197.311	4.203	5.57642	0.177813	0.336354	0.183
D1	2018-03-28	N	0.0652714	0.625	-0.20412	1.31607	197.311	4.203	5.57642	0.177813	0.336354	0.183
D1	2018-03-28	N	0.146861	1.40625	0.148063	1.31607	197.311	4.203	5.57642	0.177813	0.336354	0.183
D1	2018-03-28	N	0.146861	1.40625	0.148063	1.31607	197.311	4.203	5.57642	0.177813	0.336354	0.183
D1	2018-03-28	P	0.146861	1.40625	0.148063	1.31607	197.311	4.203	5.57642	0.177813	0.336354	0.183
D1	2018-03-28	P	0.0652714	0.625	-0.20412	1.31607	197.311	4.203	5.57642	0.177813	0.336354	0.183
D1	2018-03-28	P	0.0489535	0.46875	-0.329059	1.31607	197.311	4.203	5.57642	0.177813	0.336354	0.183
D1	2018-03-28	NP	0.114225	1.09375	0.0389181	1.31607	197.311	4.203	5.57642	0.177813	0.336354	0.183
D1	2018-03-28	NP	0.146861	1.40625	0.148063	1.31607	197.311	4.203	5.57642	0.177813	0.336354	0.183
D1	2018-03-28	NP	0.130543	1.25	0.09691	1.31607	197.311	4.203	5.57642	0.177813	0.336354	0.183
D1	2018-03-28	NP	0.097907	0.9375	-0.0280287	1.31607	197.311	4.203	5.57642	0.177813	0.336354	0.183
D1	2018-03-28	NP	0.163178	1.5625	0.19382	1.31607	197.311	4.203	5.57642	0.177813	0.336354	0.183
D2	2018-04-17	A	0.261085	1	0	1.22369	200.972	4.121	5.39	2.03463	0.689945	0.193
D2	2018-04-17	A	0.293721	1	0	1.22369	200.972	4.121	5.39	2.03463	0.689945	0.193
D2	2018-04-17	A	0.0326357	1	0	1.22369	200.972	4.121	5.39	2.03463	0.689945	0.193
D2	2018-04-17	A	0.522171	1	0	1.22369	200.972	4.121	5.39	2.03463	0.689945	0.193
D2	2018-04-17	A	0.326357	1	0	1.22369	200.972	4.121	5.39	2.03463	0.689945	0.193
D2	2018-04-17	N	0.522171	1.81818	0.259637	1.22369	200.972	4.121	5.39	2.03463	0.689945	0.193
D2	2018-04-17	N	0.146861	0.511364	-0.29127	1.22369	200.972	4.121	5.39	2.03463	0.689945	0.193
D2	2018-04-17	N	0.277403	0.965909	-0.0150637	1.22369	200.972	4.121	5.39	2.03463	0.689945	0.193
D2	2018-04-17	N	0.358992	1.25	0.09691	1.22369	200.972	4.121	5.39	2.03463	0.689945	0.193
D2	2018-04-17	N	0.342675	1.19318	0.0767066	1.22369	200.972	4.121	5.39	2.03463	0.689945	0.193
D2	2018-04-17	P	0.407946	1.42045	0.152427	1.22369	200.972	4.121	5.39	2.03463	0.689945	0.193
D2	2018-04-17	P	0.342675	1.19318	0.0767066	1.22369	200.972	4.121	5.39	2.03463	0.689945	0.193
D2	2018-04-17	P	0.163178	0.568182	-0.245513	1.22369	200.972	4.121	5.39	2.03463	0.689945	0.193
D2	2018-04-17	P	0.277403	0.965909	-0.0150637	1.22369	200.972	4.121	5.39	2.03463	0.689945	0.193
D2	2018-04-17	P	0.0652714	0.227273	-0.643453	1.22369	200.972	4.121	5.39	2.03463	0.689945	0.193
D2	2018-04-17	NP	0.097907	0.340909	-0.467361	1.22369	200.972	4.121	5.39	2.03463	0.689945	0.193
D2	2018-04-17	NP	0.22845	0.795455	-0.0993846	1.22369	200.972	4.121	5.39	2.03463	0.689945	0.193
D2	2018-04-17	NP	0.0489535	0.170455	-0.768391	1.22369	200.972	4.121	5.39	2.03463	0.689945	0.193
D2	2018-04-17	NP	0.22845	0.795455	-0.0993846	1.22369	200.972	4.121	5.39	2.03463	0.689945	0.193
D2	2018-04-17	NP	0.097907	0.340909	-0.467361	1.22369	200.972	4.121	5.39	2.03463	0.689945	0.193
D3	2018-05-07	A	0.815892	1	0	1.69682	217.018	2.6445	4.26614	9.27641	1.7358	0.184
D3	2018-05-07	A	0.815892	1	0	1.69682	217.018	2.6445	4.26614	9.27641	1.7358	0.184
D3	2018-05-07	A	0.97907	1	0	1.69682	217.018	2.6445	4.26614	9.27641	1.7358	0.184
D3	2018-05-07	A	0.38075	1	0	1.69682	217.018	2.6445	4.26614	9.27641	1.7358	0.184
D3	2018-05-07	A	0.620078	1	0	1.69682	217.018	2.6445	4.26614	9.27641	1.7358	0.184
D3	2018-05-07	N	0.435142	0.60241	-0.220108	1.69682	217.018	2.6445	4.26614	9.27641	1.7358	0.184
D3	2018-05-07	N	0.783256	1.08434	0.0351644	1.69682	217.018	2.6445	4.26614	9.27641	1.7358	0.184
D3	2018-05-07	N	1.01171	1.4006	0.146315	1.69682	217.018	2.6445	4.26614	9.27641	1.7358	0.184
D3	2018-05-07	N	1.08786	1.50602	0.177832	1.69682	217.018	2.6445	4.26614	9.27641	1.7358	0.184
D3	2018-05-07	N	0.478657	0.662651	-0.178715	1.69682	217.018	2.6445	4.26614	9.27641	1.7358	0.184
D3	2018-05-07	P	1.08786	1.50602	0.177832	1.69682	217.018	2.6445	4.26614	9.27641	1.7358	0.184
D3	2018-05-07	P	0.609199	0.843373	-0.0739801	1.69682	217.018	2.6445	4.26614	9.27641	1.7358	0.184
D3	2018-05-07	P	0.598321	0.828313	-0.0818054	1.69682	217.018	2.6445	4.26614	9.27641	1.7358	0.184
D3	2018-05-07	P	0.358992	0.496988	-0.303654	1.69682	217.018	2.6445	4.26614	9.27641	1.7358	0.184
D3	2018-05-07	P	0.456899	0.63253	-0.198919	1.69682	217.018	2.6445	4.26614	9.27641	1.7358	0.184
D3	2018-05-07	NP	0.348114	0.481928	-0.317018	1.69682	217.018	2.6445	4.26614	9.27641	1.7358	0.184
D3	2018-05-07	NP	0.097907	0.135542	-0.867926	1.69682	217.018	2.6445	4.26614	9.27641	1.7358	0.184
D3	2018-05-07	NP	0.130543	0.180723	-0.742987	1.69682	217.018	2.6445	4.26614	9.27641	1.7358	0.184
D3	2018-05-07	NP	0.609199	0.843373	-0.0739801	1.69682	217.018	2.6445	4.26614	9.27641	1.7358	0.184
D3	2018-05-07	NP	0.337235	0.466867	-0.330806	1.69682	217.018	2.6445	4.26614	9.27641	1.7358	0.184
D4	2018-05-27	A	2.3824	1	0	2.136	175.904	0.958	3.14436	9.46536	1.95834	0.214
D4	2018-05-27	A	2.00165	1	0	2.136	175.904	0.958	3.14436	9.46536	1.95834	0.214
D4	2018-05-27	A	1.70793	1	0	2.136	175.904	0.958	3.14436	9.46536	1.95834	0.214
D4	2018-05-27	A	1.65354	1	0	2.136	175.904	0.958	3.14436	9.46536	1.95834	0.214
D4	2018-05-27	A	2.01253	1	0	2.136	175.904	0.958	3.14436	9.46536	1.95834	0.214
D4	2018-05-27	N	4.83008	2.47492	0.393561	2.136	175.904	0.958	3.14436	9.46536	1.95834	0.214
D4	2018-05-27	N	1.24016	0.635452	-0.196918	2.136	175.904	0.958	3.14436	9.46536	1.95834	0.214
D4	2018-05-27	N	3.10039	1.58863	0.201022	2.136	175.904	0.958	3.14436	9.46536	1.95834	0.214
D4	2018-05-27	N	3.58992	1.83946	0.264692	2.136	175.904	0.958	3.14436	9.46536	1.95834	0.214
D4	2018-05-27	N	2.31713	1.18729	0.0745572	2.136	175.904	0.958	3.14436	9.46536	1.95834	0.214
D4	2018-05-27	P	1.94726	0.99777	-0.000969408	2.136	175.904	0.958	3.14436	9.46536	1.95834	0.214
D4	2018-05-27	P	1.88199	0.964326	-0.0157763	2.136	175.904	0.958	3.14436	9.46536	1.95834	0.214
D4	2018-05-27	P	1.88199	0.964326	-0.0157763	2.136	175.904	0.958	3.14436	9.46536	1.95834	0.214
D4	2018-05-27	P	1.84935	0.947603	-0.0233735	2.136	175.904	0.958	3.14436	9.46536	1.95834	0.214
D4	2018-05-27	P	1.61003	0.824972	-0.0835607	2.136	175.904	0.958	3.14436	9.46536	1.95834	0.214
D4	2018-05-27	NP	2.40416	1.23188	0.0905698	2.136	175.904	0.958	3.14436	9.46536	1.95834	0.214
D4	2018-05-27	NP	1.76233	0.90301	-0.0443074	2.136	175.904	0.958	3.14436	9.46536	1.95834	0.214
D4	2018-05-27	NP	1.72969	0.886288	-0.0524253	2.136	175.904	0.958	3.14436	9.46536	1.95834	0.214
D4	2018-05-27	NP	2.06693	1.05909	0.0249312	2.136	175.904	0.958	3.14436	9.46536	1.95834	0.214
D4	2018-05-27	NP	2.03429	1.04236	0.0180192	2.136	175.904	0.958	3.14436	9.46536	1.95834	0.214
D5	2018-06-20	A	2.50207	1	0	2.26243	76.691	1.842	4.19889	7.21716	2.27325	0.259
D5	2018-06-20	A	1.75145	1	0	2.26243	76.691	1.842	4.19889	7.21716	2.27325	0.259
D5	2018-06-20	A	1.19664	1	0	2.26243	76.691	1.842	4.19889	7.21716	2.27325	0.259
D5	2018-06-20	A	1.88199	1	0	2.26243	76.691	1.842	4.19889	7.21716	2.27325	0.259
D5	2018-06-20	A	0.739742	1	0	2.26243	76.691	1.842	4.19889	7.21716	2.27325	0.259
D5	2018-06-20	N	1.38158	0.855795	-0.0676302	2.26243	76.691	1.842	4.19889	7.21716	2.27325	0.259
D5	2018-06-20	N	1.40333	0.869272	-0.0608442	2.26243	76.691	1.842	4.19889	7.21716	2.27325	0.259
D5	2018-06-20	N	2.39328	1.48248	0.170989	2.26243	76.691	1.842	4.19889	7.21716	2.27325	0.259
D5	2018-06-20	N	3.20917	1.98787	0.298388	2.26243	76.691	1.842	4.19889	7.21716	2.27325	0.259
D5	2018-06-20	N	1.17488	0.727763	-0.13801	2.26243	76.691	1.842	4.19889	7.21716	2.27325	0.259
D5	2018-06-20	P	1.13137	0.700809	-0.154401	2.26243	76.691	1.842	4.19889	7.21716	2.27325	0.259
D5	2018-06-20	P	0.837649	0.518868	-0.284943	2.26243	76.691	1.842	4.19889	7.21716	2.27325	0.259
D5	2018-06-20	P	1.09873	0.680593	-0.167113	2.26243	76.691	1.842	4.19889	7.21716	2.27325	0.259
D5	2018-06-20	P	1.61003	0.997305	-0.00117219	2.26243	76.691	1.842	4.19889	7.21716	2.27325	0.259
D5	2018-06-20	P	0.968192	0.59973	-0.222044	2.26243	76.691	1.842	4.19889	7.21716	2.27325	0.259
D5	2018-06-20	NP	2.49119	1.54313	0.188402	2.26243	76.691	1.842	4.19889	7.21716	2.27325	0.259
D5	2018-06-20	NP	2.67613	1.65768	0.219501	2.26243	76.691	1.842	4.19889	7.21716	2.27325	0.259
D5	2018-06-20	NP	2.51295	1.5566	0.192178	2.26243	76.691	1.842	4.19889	7.21716	2.27325	0.259
D5	2018-06-20	NP	2.00165	1.23989	0.0933839	2.26243	76.691	1.842	4.19889	7.21716	2.27325	0.259
D5	2018-06-20	NP	2.36065	1.46226	0.165026	2.26243	76.691	1.842	4.19889	7.21716	2.27325	0.259
D6	2018-07-10	A	0.82677	1	0	2.16976	62.2283	1.45133	3.21636	5.928	4.156	0.243
D6	2018-07-10	A	1.26191	1	0	2.16976	62.2283	1.45133	3.21636	5.928	4.156	0.243
D6	2018-07-10	A	0.641835	1	0	2.16976	62.2283	1.45133	3.21636	5.928	4.156	0.243
D6	2018-07-10	A	1.04434	1	0	2.16976	62.2283	1.45133	3.21636	5.928	4.156	0.243
D6	2018-07-10	A	0.717985	1	0	2.16976	62.2283	1.45133	3.21636	5.928	4.156	0.243
D6	2018-07-10	N	1.03346	1.15012	0.0607436	2.16976	62.2283	1.45133	3.21636	5.928	4.156	0.243
D6	2018-07-10	N	1.10961	1.23487	0.0916201	2.16976	62.2283	1.45133	3.21636	5.928	4.156	0.243
D6	2018-07-10	N	1.29455	1.44068	0.158567	2.16976	62.2283	1.45133	3.21636	5.928	4.156	0.243
D6	2018-07-10	N	1.17488	1.30751	0.116444	2.16976	62.2283	1.45133	3.21636	5.928	4.156	0.243
D6	2018-07-10	N	0.870285	0.968523	-0.0138901	2.16976	62.2283	1.45133	3.21636	5.928	4.156	0.243
D6	2018-07-10	P	1.29455	1.44068	0.158567	2.16976	62.2283	1.45133	3.21636	5.928	4.156	0.243
D6	2018-07-10	P	1.55563	1.73123	0.238356	2.16976	62.2283	1.45133	3.21636	5.928	4.156	0.243
D6	2018-07-10	P	1.54476	1.71913	0.235308	2.16976	62.2283	1.45133	3.21636	5.928	4.156	0.243
D6	2018-07-10	P	1.8276	2.0339	0.308329	2.16976	62.2283	1.45133	3.21636	5.928	4.156	0.243
D6	2018-07-10	P	1.42509	1.58596	0.200291	2.16976	62.2283	1.45133	3.21636	5.928	4.156	0.243
D6	2018-07-10	NP	2.0778	2.31235	0.364053	2.16976	62.2283	1.45133	3.21636	5.928	4.156	0.243
D6	2018-07-10	NP	3.93804	4.38257	0.641729	2.16976	62.2283	1.45133	3.21636	5.928	4.156	0.243
D6	2018-07-10	NP	4.48197	4.98789	0.697917	2.16976	62.2283	1.45133	3.21636	5.928	4.156	0.243
D6	2018-07-10	NP	2.33889	2.60291	0.415458	2.16976	62.2283	1.45133	3.21636	5.928	4.156	0.243
D6	2018-07-10	NP	3.4485	3.83777	0.584079	2.16976	62.2283	1.45133	3.21636	5.928	4.156	0.243
D7	2018-07-30	A	1.78408	1	0	1.60001	54.541	0.841667	2.25438	6.30843	6.30036	0.21
D7	2018-07-30	A	2.01253	1	0	1.60001	54.541	0.841667	2.25438	6.30843	6.30036	0.21
D7	2018-07-30	A	1.90375	1	0	1.60001	54.541	0.841667	2.25438	6.30843	6.30036	0.21
D7	2018-07-30	A	1.75145	1	0	1.60001	54.541	0.841667	2.25438	6.30843	6.30036	0.21
D7	2018-07-30	A	1.59915	1	0	1.60001	54.541	0.841667	2.25438	6.30843	6.30036	0.21
D7	2018-07-30	N	3.20917	1.77284	0.248669	1.60001	54.541	0.841667	2.25438	6.30843	6.30036	0.21
D7	2018-07-30	N	1.40333	0.77524	-0.110564	1.60001	54.541	0.841667	2.25438	6.30843	6.30036	0.21
D7	2018-07-30	N	1.70793	0.94351	-0.0252537	1.60001	54.541	0.841667	2.25438	6.30843	6.30036	0.21
D7	2018-07-30	N	3.18742	1.76082	0.245714	1.60001	54.541	0.841667	2.25438	6.30843	6.30036	0.21
D7	2018-07-30	N	1.42509	0.78726	-0.103882	1.60001	54.541	0.841667	2.25438	6.30843	6.30036	0.21
D7	2018-07-30	P	1.78408	0.985577	-0.00630947	1.60001	54.541	0.841667	2.25438	6.30843	6.30036	0.21
D7	2018-07-30	P	1.523	0.841346	-0.0750253	1.60001	54.541	0.841667	2.25438	6.30843	6.30036	0.21
D7	2018-07-30	P	1.8276	1.00962	0.00415596	1.60001	54.541	0.841667	2.25438	6.30843	6.30036	0.21
D7	2018-07-30	P	0.989949	0.546875	-0.262112	1.60001	54.541	0.841667	2.25438	6.30843	6.30036	0.21
D7	2018-07-30	P	0.913799	0.504808	-0.296874	1.60001	54.541	0.841667	2.25438	6.30843	6.30036	0.21
D7	2018-07-30	NP	3.79662	2.09736	0.321672	1.60001	54.541	0.841667	2.25438	6.30843	6.30036	0.21
D7	2018-07-30	NP	3.2962	1.82091	0.260289	1.60001	54.541	0.841667	2.25438	6.30843	6.30036	0.21
D7	2018-07-30	NP	5.29786	2.92668	0.466376	1.60001	54.541	0.841667	2.25438	6.30843	6.30036	0.21
D7	2018-07-30	NP	4.25352	2.34976	0.371023	1.60001	54.541	0.841667	2.25438	6.30843	6.30036	0.21
D7	2018-07-30	NP	3.99243	2.20553	0.343513	1.60001	54.541	0.841667	2.25438	6.30843	6.30036	0.21
D8	2018-08-19	A	1.20752	1	0	1.5557	52.689	0.7755	2.06815	5.46375	8.28416	0.211
D8	2018-08-19	A	1.09873	1	0	1.5557	52.689	0.7755	2.06815	5.46375	8.28416	0.211
D8	2018-08-19	A	1.44685	1	0	1.5557	52.689	0.7755	2.06815	5.46375	8.28416	0.211
D8	2018-08-19	A	1.31631	1	0	1.5557	52.689	0.7755	2.06815	5.46375	8.28416	0.211
D8	2018-08-19	A	1.32718	1	0	1.5557	52.689	0.7755	2.06815	5.46375	8.28416	0.211
D8	2018-08-19	N	1.32718	1.03741	0.0159525	1.5557	52.689	0.7755	2.06815	5.46375	8.28416	0.211
D8	2018-08-19	N	2.96985	2.32143	0.365755	1.5557	52.689	0.7755	2.06815	5.46375	8.28416	0.211
D8	2018-08-19	N	1.13137	0.884354	-0.053374	1.5557	52.689	0.7755	2.06815	5.46375	8.28416	0.211
D8	2018-08-19	N	1.14225	0.892857	-0.049218	1.5557	52.689	0.7755	2.06815	5.46375	8.28416	0.211
D8	2018-08-19	N	2.04517	1.59864	0.203751	1.5557	52.689	0.7755	2.06815	5.46375	8.28416	0.211
D8	2018-08-19	P	2.24098	1.7517	0.24346	1.5557	52.689	0.7755	2.06815	5.46375	8.28416	0.211
D8	2018-08-19	P	3.10039	2.42347	0.384438	1.5557	52.689	0.7755	2.06815	5.46375	8.28416	0.211
D8	2018-08-19	P	1.66442	1.30102	0.114284	1.5557	52.689	0.7755	2.06815	5.46375	8.28416	0.211
D8	2018-08-19	P	1.81672	1.42007	0.152309	1.5557	52.689	0.7755	2.06815	5.46375	8.28416	0.211
D8	2018-08-19	P	2.06693	1.61565	0.208346	1.5557	52.689	0.7755	2.06815	5.46375	8.28416	0.211
D8	2018-08-19	NP	5.70036	4.45578	0.648924	1.5557	52.689	0.7755	2.06815	5.46375	8.28416	0.211
D8	2018-08-19	NP	5.67861	4.43878	0.647263	1.5557	52.689	0.7755	2.06815	5.46375	8.28416	0.211
D8	2018-08-19	NP	6.94052	5.42517	0.734413	1.5557	52.689	0.7755	2.06815	5.46375	8.28416	0.211
D8	2018-08-19	NP	7.46269	5.83333	0.765917	1.5557	52.689	0.7755	2.06815	5.46375	8.28416	0.211
D8	2018-08-19	NP	5.71124	4.46429	0.649752	1.5557	52.689	0.7755	2.06815	5.46375	8.28416	0.211
D9	2018-09-08	A	1.99078	1	0	1.653	68.6705	1.0815	2.03	3.74905	8.94034	0.214
D9	2018-09-08	A	1.84935	1	0	1.653	68.6705	1.0815	2.03	3.74905	8.94034	0.214
D9	2018-09-08	A	2.2845	1	0	1.653	68.6705	1.0815	2.03	3.74905	8.94034	0.214
D9	2018-09-08	A	1.83848	1	0	1.653	68.6705	1.0815	2.03	3.74905	8.94034	0.214
D9	2018-09-08	A	2.40416	1	0	1.653	68.6705	1.0815	2.03	3.74905	8.94034	0.214
D9	2018-09-08	N	4.47109	2.15635	0.333719	1.653	68.6705	1.0815	2.03	3.74905	8.94034	0.214
D9	2018-09-08	N	2.54558	1.2277	0.089093	1.653	68.6705	1.0815	2.03	3.74905	8.94034	0.214
D9	2018-09-08	N	5.16732	2.49213	0.396571	1.653	68.6705	1.0815	2.03	3.74905	8.94034	0.214
D9	2018-09-08	N	2.91545	1.40609	0.148012	1.653	68.6705	1.0815	2.03	3.74905	8.94034	0.214
D9	2018-09-08	N	5.35225	2.58132	0.411842	1.653	68.6705	1.0815	2.03	3.74905	8.94034	0.214
D9	2018-09-08	P	3.046	1.46905	0.167035	1.653	68.6705	1.0815	2.03	3.74905	8.94034	0.214
D9	2018-09-08	P	2.82843	1.36411	0.13485	1.653	68.6705	1.0815	2.03	3.74905	8.94034	0.214
D9	2018-09-08	P	4.63427	2.23505	0.349287	1.653	68.6705	1.0815	2.03	3.74905	8.94034	0.214
D9	2018-09-08	P	2.82843	1.36411	0.13485	1.653	68.6705	1.0815	2.03	3.74905	8.94034	0.214
D9	2018-09-08	P	3.1439	1.51626	0.180775	1.653	68.6705	1.0815	2.03	3.74905	8.94034	0.214
D9	2018-09-08	NP	8.89866	4.29171	0.63263	1.653	68.6705	1.0815	2.03	3.74905	8.94034	0.214
D9	2018-09-08	NP	6.86437	3.3106	0.519906	1.653	68.6705	1.0815	2.03	3.74905	8.94034	0.214
D9	2018-09-08	NP	7.12546	3.43652	0.536118	1.653	68.6705	1.0815	2.03	3.74905	8.94034	0.214
D9	2018-09-08	NP	7.53884	3.63589	0.56061	1.653	68.6705	1.0815	2.03	3.74905	8.94034	0.214
D9	2018-09-08	NP	7.19073	3.468	0.540079	1.653	68.6705	1.0815	2.03	3.74905	8.94034	0.214
D10	2018-09-28	A	2.19747	1	0	1.72265	83.471	1.0205	2.46	2.84875	8.22052	0.214
D10	2018-09-28	A	2.91545	1	0	1.72265	83.471	1.0205	2.46	2.84875	8.22052	0.214
D10	2018-09-28	A	1.56651	1	0	1.72265	83.471	1.0205	2.46	2.84875	8.22052	0.214
D10	2018-09-28	A	3.13302	1	0	1.72265	83.471	1.0205	2.46	2.84875	8.22052	0.214
D10	2018-09-28	A	1.24016	1	0	1.72265	83.471	1.0205	2.46	2.84875	8.22052	0.214
D10	2018-09-28	N	5.48279	2.48031	0.394507	1.72265	83.471	1.0205	2.46	2.84875	8.22052	0.214
D10	2018-09-28	N	5.55894	2.51476	0.400497	1.72265	83.471	1.0205	2.46	2.84875	8.22052	0.214
D10	2018-09-28	N	4.80832	2.1752	0.337499	1.72265	83.471	1.0205	2.46	2.84875	8.22052	0.214
D10	2018-09-28	N	4.26439	1.92913	0.285362	1.72265	83.471	1.0205	2.46	2.84875	8.22052	0.214
D10	2018-09-28	N	4.41669	1.99803	0.300602	1.72265	83.471	1.0205	2.46	2.84875	8.22052	0.214
D10	2018-09-28	P	4.19912	1.89961	0.278664	1.72265	83.471	1.0205	2.46	2.84875	8.22052	0.214
D10	2018-09-28	P	1.59915	0.723425	-0.140606	1.72265	83.471	1.0205	2.46	2.84875	8.22052	0.214
D10	2018-09-28	P	2.15395	0.974409	-0.0112585	1.72265	83.471	1.0205	2.46	2.84875	8.22052	0.214
D10	2018-09-28	P	2.86106	1.29429	0.112032	1.72265	83.471	1.0205	2.46	2.84875	8.22052	0.214
D10	2018-09-28	P	4.19912	1.89961	0.278664	1.72265	83.471	1.0205	2.46	2.84875	8.22052	0.214
D10	2018-09-28	NP	5.21083	2.35728	0.372412	1.72265	83.471	1.0205	2.46	2.84875	8.22052	0.214
D10	2018-09-28	NP	4.22088	1.90945	0.280908	1.72265	83.471	1.0205	2.46	2.84875	8.22052	0.214
D10	2018-09-28	NP	2.94809	1.33366	0.125046	1.72265	83.471	1.0205	2.46	2.84875	8.22052	0.214
D10	2018-09-28	NP	5.23259	2.36713	0.374221	1.72265	83.471	1.0205	2.46	2.84875	8.22052	0.214
D10	2018-09-28	NP	1.96902	0.890748	-0.0502451	1.72265	83.471	1.0205	2.46	2.84875	8.22052	0.214

## Sheet: GPP
Deployment	Date	Treatment	GPP	GPP.RR	log(RRx)	DOC	DIN	SRP	TP	DPF	meanT	Depth
D1	2018-03-28	A	2.59248	1	0	1.31607	197.311	4.203	5.57642	0.177813	0.336354	0.183
D1	2018-03-28	A	2.4689	1	0	1.31607	197.311	4.203	5.57642	0.177813	0.336354	0.183
D1	2018-03-28	A	3.3569	1	0	1.31607	197.311	4.203	5.57642	0.177813	0.336354	0.183
D1	2018-03-28	A	2.72781	1	0	1.31607	197.311	4.203	5.57642	0.177813	0.336354	0.183
D1	2018-03-28	A	2.25665	1	0	1.31607	197.311	4.203	5.57642	0.177813	0.336354	0.183
D1	2018-03-28	N	3.25421	1.21401	0.084222	1.31607	197.311	4.203	5.57642	0.177813	0.336354	0.183
D1	2018-03-28	N	2.86109	1.06735	0.0283073	1.31607	197.311	4.203	5.57642	0.177813	0.336354	0.183
D1	2018-03-28	N	1.66369	0.620654	-0.20715	1.31607	197.311	4.203	5.57642	0.177813	0.336354	0.183
D1	2018-03-28	N	2.73181	1.01912	0.00822651	1.31607	197.311	4.203	5.57642	0.177813	0.336354	0.183
D1	2018-03-28	N	2.64856	0.988065	-0.00521466	1.31607	197.311	4.203	5.57642	0.177813	0.336354	0.183
D1	2018-03-28	P	3.08319	1.15021	0.0607759	1.31607	197.311	4.203	5.57642	0.177813	0.336354	0.183
D1	2018-03-28	P	2.84865	1.06271	0.0264148	1.31607	197.311	4.203	5.57642	0.177813	0.336354	0.183
D1	2018-03-28	P	2.42667	0.905288	-0.0432133	1.31607	197.311	4.203	5.57642	0.177813	0.336354	0.183
D1	2018-03-28	P	2.42067	0.903051	-0.0442877	1.31607	197.311	4.203	5.57642	0.177813	0.336354	0.183
D1	2018-03-28	NP	2.71498	0.898611	-0.0464284	1.31607	197.311	4.203	5.57642	0.177813	0.336354	0.183
D1	2018-03-28	NP	2.40877	0.868539	-0.0612106	1.31607	197.311	4.203	5.57642	0.177813	0.336354	0.183
D1	2018-03-28	NP	2.32816	0.922013	-0.0352629	1.31607	197.311	4.203	5.57642	0.177813	0.336354	0.183
D1	2018-03-28	NP	2.4715	1.23868	0.0929576	1.31607	197.311	4.203	5.57642	0.177813	0.336354	0.183
D1	2018-03-28	NP	3.32033	0.99	-0.00436481	1.31607	197.311	4.203	5.57642	0.177813	0.336354	0.183
D2	2018-04-17	A	2.74985	1	0	1.22369	200.972	4.121	5.39	2.03463	0.689945	0.193
D2	2018-04-17	A	3.44065	1	0	1.22369	200.972	4.121	5.39	2.03463	0.689945	0.193
D2	2018-04-17	A	3.45057	1	0	1.22369	200.972	4.121	5.39	2.03463	0.689945	0.193
D2	2018-04-17	A	3.69467	1	0	1.22369	200.972	4.121	5.39	2.03463	0.689945	0.193
D2	2018-04-17	A	2.60844	1	0	1.22369	200.972	4.121	5.39	2.03463	0.689945	0.193
D2	2018-04-17	N	2.48815	0.78027	-0.107755	1.22369	200.972	4.121	5.39	2.03463	0.689945	0.193
D2	2018-04-17	N	2.4819	0.77831	-0.108847	1.22369	200.972	4.121	5.39	2.03463	0.689945	0.193
D2	2018-04-17	N	2.79551	0.876655	-0.0571715	1.22369	200.972	4.121	5.39	2.03463	0.689945	0.193
D2	2018-04-17	N	2.29226	0.718838	-0.143369	1.22369	200.972	4.121	5.39	2.03463	0.689945	0.193
D2	2018-04-17	N	2.39262	0.750311	-0.124759	1.22369	200.972	4.121	5.39	2.03463	0.689945	0.193
D2	2018-04-17	P	2.41593	0.75762	-0.120548	1.22369	200.972	4.121	5.39	2.03463	0.689945	0.193
D2	2018-04-17	P	2.37485	0.744739	-0.127996	1.22369	200.972	4.121	5.39	2.03463	0.689945	0.193
D2	2018-04-17	P	2.33206	0.731319	-0.135893	1.22369	200.972	4.121	5.39	2.03463	0.689945	0.193
D2	2018-04-17	P	1.59222	0.499311	-0.301629	1.22369	200.972	4.121	5.39	2.03463	0.689945	0.193
D2	2018-04-17	P	1.86809	0.585822	-0.232235	1.22369	200.972	4.121	5.39	2.03463	0.689945	0.193
D2	2018-04-17	NP	3.35117	1.05091	0.0215641	1.22369	200.972	4.121	5.39	2.03463	0.689945	0.193
D2	2018-04-17	NP	2.38023	0.746427	-0.127012	1.22369	200.972	4.121	5.39	2.03463	0.689945	0.193
D2	2018-04-17	NP	1.48476	0.465613	-0.331975	1.22369	200.972	4.121	5.39	2.03463	0.689945	0.193
D2	2018-04-17	NP	2.15963	0.677246	-0.169254	1.22369	200.972	4.121	5.39	2.03463	0.689945	0.193
D2	2018-04-17	NP	2.32923	0.730433	-0.13642	1.22369	200.972	4.121	5.39	2.03463	0.689945	0.193
D3	2018-05-07	A	4.30016	1	0	1.69682	217.018	2.6445	4.26614	9.27641	1.7358	0.184
D3	2018-05-07	A	4.3335	1	0	1.69682	217.018	2.6445	4.26614	9.27641	1.7358	0.184
D3	2018-05-07	A	4.80981	1	0	1.69682	217.018	2.6445	4.26614	9.27641	1.7358	0.184
D3	2018-05-07	A	3.30779	1	0	1.69682	217.018	2.6445	4.26614	9.27641	1.7358	0.184
D3	2018-05-07	A	2.80624	1	0	1.69682	217.018	2.6445	4.26614	9.27641	1.7358	0.184
D3	2018-05-07	N	3.04883	0.779453	-0.10821	1.69682	217.018	2.6445	4.26614	9.27641	1.7358	0.184
D3	2018-05-07	N	4.96993	1.27059	0.104007	1.69682	217.018	2.6445	4.26614	9.27641	1.7358	0.184
D3	2018-05-07	N	7.03506	1.79856	0.254924	1.69682	217.018	2.6445	4.26614	9.27641	1.7358	0.184
D3	2018-05-07	N	4.85825	1.24204	0.094137	1.69682	217.018	2.6445	4.26614	9.27641	1.7358	0.184
D3	2018-05-07	N	3.3257	0.850235	-0.0704608	1.69682	217.018	2.6445	4.26614	9.27641	1.7358	0.184
D3	2018-05-07	P	6.36096	1.62622	0.21118	1.69682	217.018	2.6445	4.26614	9.27641	1.7358	0.184
D3	2018-05-07	P	3.92973	1.00466	0.00201987	1.69682	217.018	2.6445	4.26614	9.27641	1.7358	0.184
D3	2018-05-07	P	5.11428	1.3075	0.116441	1.69682	217.018	2.6445	4.26614	9.27641	1.7358	0.184
D3	2018-05-07	P	3.94635	1.00891	0.00385183	1.69682	217.018	2.6445	4.26614	9.27641	1.7358	0.184
D3	2018-05-07	P	3.67473	0.939468	-0.027118	1.69682	217.018	2.6445	4.26614	9.27641	1.7358	0.184
D3	2018-05-07	NP	3.96251	1.01304	0.00562742	1.69682	217.018	2.6445	4.26614	9.27641	1.7358	0.184
D3	2018-05-07	NP	4.48837	1.14748	0.0597452	1.69682	217.018	2.6445	4.26614	9.27641	1.7358	0.184
D3	2018-05-07	NP	3.65577	0.93462	-0.0293649	1.69682	217.018	2.6445	4.26614	9.27641	1.7358	0.184
D3	2018-05-07	NP	5.14049	1.3142	0.118661	1.69682	217.018	2.6445	4.26614	9.27641	1.7358	0.184
D3	2018-05-07	NP	3.96874	1.01463	0.006309	1.69682	217.018	2.6445	4.26614	9.27641	1.7358	0.184
D4	2018-05-27	A	4.56422	1	0	2.136	175.904	0.958	3.14436	9.46536	1.95834	0.214
D4	2018-05-27	A	4.47415	1	0	2.136	175.904	0.958	3.14436	9.46536	1.95834	0.214
D4	2018-05-27	A	4.21257	1	0	2.136	175.904	0.958	3.14436	9.46536	1.95834	0.214
D4	2018-05-27	A	3.18914	1	0	2.136	175.904	0.958	3.14436	9.46536	1.95834	0.214
D4	2018-05-27	A	4.59272	1	0	2.136	175.904	0.958	3.14436	9.46536	1.95834	0.214
D4	2018-05-27	N	7.18752	1.70865	0.232652	2.136	175.904	0.958	3.14436	9.46536	1.95834	0.214
D4	2018-05-27	N	3.75583	0.892852	-0.0492206	2.136	175.904	0.958	3.14436	9.46536	1.95834	0.214
D4	2018-05-27	N	6.98889	1.66143	0.220481	2.136	175.904	0.958	3.14436	9.46536	1.95834	0.214
D4	2018-05-27	N	8.6628	2.05935	0.313731	2.136	175.904	0.958	3.14436	9.46536	1.95834	0.214
D4	2018-05-27	N	6.43026	1.52863	0.184301	2.136	175.904	0.958	3.14436	9.46536	1.95834	0.214
D4	2018-05-27	P	5.66908	1.34768	0.129586	2.136	175.904	0.958	3.14436	9.46536	1.95834	0.214
D4	2018-05-27	P	4.75927	1.13139	0.053613	2.136	175.904	0.958	3.14436	9.46536	1.95834	0.214
D4	2018-05-27	P	4.89268	1.16311	0.0656196	2.136	175.904	0.958	3.14436	9.46536	1.95834	0.214
D4	2018-05-27	P	4.81246	1.14404	0.05844	2.136	175.904	0.958	3.14436	9.46536	1.95834	0.214
D4	2018-05-27	P	4.55399	1.08259	0.034465	2.136	175.904	0.958	3.14436	9.46536	1.95834	0.214
D4	2018-05-27	NP	6.04724	1.43757	0.15763	2.136	175.904	0.958	3.14436	9.46536	1.95834	0.214
D4	2018-05-27	NP	5.92299	1.40804	0.148614	2.136	175.904	0.958	3.14436	9.46536	1.95834	0.214
D4	2018-05-27	NP	5.13858	1.22156	0.0869164	2.136	175.904	0.958	3.14436	9.46536	1.95834	0.214
D4	2018-05-27	NP	5.55475	1.3205	0.120737	2.136	175.904	0.958	3.14436	9.46536	1.95834	0.214
D4	2018-05-27	NP	6.86921	1.63298	0.21298	2.136	175.904	0.958	3.14436	9.46536	1.95834	0.214
D5	2018-06-20	A	7.07656	1	0	2.26243	76.691	1.842	4.19889	7.21716	2.27325	0.259
D5	2018-06-20	A	4.92733	1	0	2.26243	76.691	1.842	4.19889	7.21716	2.27325	0.259
D5	2018-06-20	A	4.76688	1	0	2.26243	76.691	1.842	4.19889	7.21716	2.27325	0.259
D5	2018-06-20	A	6.97511	1	0	2.26243	76.691	1.842	4.19889	7.21716	2.27325	0.259
D5	2018-06-20	A	4.09444	1	0	2.26243	76.691	1.842	4.19889	7.21716	2.27325	0.259
D5	2018-06-20	N	4.35788	0.782656	-0.106429	2.26243	76.691	1.842	4.19889	7.21716	2.27325	0.259
D5	2018-06-20	N	5.97405	1.07291	0.0305643	2.26243	76.691	1.842	4.19889	7.21716	2.27325	0.259
D5	2018-06-20	N	6.87652	1.23499	0.0916644	2.26243	76.691	1.842	4.19889	7.21716	2.27325	0.259
D5	2018-06-20	N	8.12541	1.45929	0.164141	2.26243	76.691	1.842	4.19889	7.21716	2.27325	0.259
D5	2018-06-20	N	4.92099	0.883788	-0.053652	2.26243	76.691	1.842	4.19889	7.21716	2.27325	0.259
D5	2018-06-20	P	4.65187	0.835456	-0.0780765	2.26243	76.691	1.842	4.19889	7.21716	2.27325	0.259
D5	2018-06-20	P	4.49318	0.806956	-0.09315	2.26243	76.691	1.842	4.19889	7.21716	2.27325	0.259
D5	2018-06-20	P	4.63161	0.831817	-0.0799722	2.26243	76.691	1.842	4.19889	7.21716	2.27325	0.259
D5	2018-06-20	P	5.5531	0.997312	-0.00116907	2.26243	76.691	1.842	4.19889	7.21716	2.27325	0.259
D5	2018-06-20	P	4.76116	0.855083	-0.0679915	2.26243	76.691	1.842	4.19889	7.21716	2.27325	0.259
D5	2018-06-20	NP	10.9349	1.96386	0.29311	2.26243	76.691	1.842	4.19889	7.21716	2.27325	0.259
D5	2018-06-20	NP	8.9398	1.60555	0.205623	2.26243	76.691	1.842	4.19889	7.21716	2.27325	0.259
D5	2018-06-20	NP	7.45374	1.33866	0.12667	2.26243	76.691	1.842	4.19889	7.21716	2.27325	0.259
D5	2018-06-20	NP	7.89231	1.41742	0.1515	2.26243	76.691	1.842	4.19889	7.21716	2.27325	0.259
D5	2018-06-20	NP	8.39401	1.50753	0.178265	2.26243	76.691	1.842	4.19889	7.21716	2.27325	0.259
D6	2018-07-10	A	4.06591	1	0	2.16976	62.2283	1.45133	3.21636	5.928	4.156	0.243
D6	2018-07-10	A	4.55843	1	0	2.16976	62.2283	1.45133	3.21636	5.928	4.156	0.243
D6	2018-07-10	A	3.65741	1	0	2.16976	62.2283	1.45133	3.21636	5.928	4.156	0.243
D6	2018-07-10	A	3.76818	1	0	2.16976	62.2283	1.45133	3.21636	5.928	4.156	0.243
D6	2018-07-10	A	4.06394	1	0	2.16976	62.2283	1.45133	3.21636	5.928	4.156	0.243
D6	2018-07-10	N	3.96194	0.984878	-0.00661769	2.16976	62.2283	1.45133	3.21636	5.928	4.156	0.243
D6	2018-07-10	N	4.70727	1.17016	0.0682435	2.16976	62.2283	1.45133	3.21636	5.928	4.156	0.243
D6	2018-07-10	N	5.26645	1.30916	0.116992	2.16976	62.2283	1.45133	3.21636	5.928	4.156	0.243
D6	2018-07-10	N	4.38315	1.08958	0.0372602	2.16976	62.2283	1.45133	3.21636	5.928	4.156	0.243
D6	2018-07-10	N	3.5778	0.889385	-0.0509101	2.16976	62.2283	1.45133	3.21636	5.928	4.156	0.243
D6	2018-07-10	P	3.90579	0.97092	-0.0128165	2.16976	62.2283	1.45133	3.21636	5.928	4.156	0.243
D6	2018-07-10	P	4.69284	1.16657	0.0669102	2.16976	62.2283	1.45133	3.21636	5.928	4.156	0.243
D6	2018-07-10	P	5.32335	1.3233	0.12166	2.16976	62.2283	1.45133	3.21636	5.928	4.156	0.243
D6	2018-07-10	P	5.26253	1.30818	0.116669	2.16976	62.2283	1.45133	3.21636	5.928	4.156	0.243
D6	2018-07-10	P	5.10839	1.26987	0.103759	2.16976	62.2283	1.45133	3.21636	5.928	4.156	0.243
D6	2018-07-10	NP	4.64212	1.15396	0.0621906	2.16976	62.2283	1.45133	3.21636	5.928	4.156	0.243
D6	2018-07-10	NP	5.48362	1.36314	0.134542	2.16976	62.2283	1.45133	3.21636	5.928	4.156	0.243
D6	2018-07-10	NP	6.20957	1.5436	0.188536	2.16976	62.2283	1.45133	3.21636	5.928	4.156	0.243
D6	2018-07-10	NP	5.8239	1.44773	0.160688	2.16976	62.2283	1.45133	3.21636	5.928	4.156	0.243
D6	2018-07-10	NP	7.52469	1.87052	0.271963	2.16976	62.2283	1.45133	3.21636	5.928	4.156	0.243
D7	2018-07-30	A	4.22843	1	0	1.60001	54.541	0.841667	2.25438	6.30843	6.30036	0.21
D7	2018-07-30	A	6.27867	1	0	1.60001	54.541	0.841667	2.25438	6.30843	6.30036	0.21
D7	2018-07-30	A	5.33295	1	0	1.60001	54.541	0.841667	2.25438	6.30843	6.30036	0.21
D7	2018-07-30	A	4.85014	1	0	1.60001	54.541	0.841667	2.25438	6.30843	6.30036	0.21
D7	2018-07-30	A	5.30486	1	0	1.60001	54.541	0.841667	2.25438	6.30843	6.30036	0.21
D7	2018-07-30	N	6.26876	1.20576	0.0812609	1.60001	54.541	0.841667	2.25438	6.30843	6.30036	0.21
D7	2018-07-30	N	4.55251	0.87565	-0.0576697	1.60001	54.541	0.841667	2.25438	6.30843	6.30036	0.21
D7	2018-07-30	N	7.90387	1.52026	0.181919	1.60001	54.541	0.841667	2.25438	6.30843	6.30036	0.21
D7	2018-07-30	N	6.58927	1.26741	0.102917	1.60001	54.541	0.841667	2.25438	6.30843	6.30036	0.21
D7	2018-07-30	N	4.76413	0.916354	-0.0379367	1.60001	54.541	0.841667	2.25438	6.30843	6.30036	0.21
D7	2018-07-30	P	5.72935	1.10201	0.0421851	1.60001	54.541	0.841667	2.25438	6.30843	6.30036	0.21
D7	2018-07-30	P	5.53475	1.06458	0.0271773	1.60001	54.541	0.841667	2.25438	6.30843	6.30036	0.21
D7	2018-07-30	P	5.16946	0.994316	-0.00247561	1.60001	54.541	0.841667	2.25438	6.30843	6.30036	0.21
D7	2018-07-30	P	4.43552	0.853146	-0.0689764	1.60001	54.541	0.841667	2.25438	6.30843	6.30036	0.21
D7	2018-07-30	P	3.73032	0.717506	-0.144174	1.60001	54.541	0.841667	2.25438	6.30843	6.30036	0.21
D7	2018-07-30	NP	7.50406	1.44336	0.159375	1.60001	54.541	0.841667	2.25438	6.30843	6.30036	0.21
D7	2018-07-30	NP	8.81803	1.6961	0.229451	1.60001	54.541	0.841667	2.25438	6.30843	6.30036	0.21
D7	2018-07-30	NP	7.38585	1.42063	0.15248	1.60001	54.541	0.841667	2.25438	6.30843	6.30036	0.21
D7	2018-07-30	NP	7.51766	1.44598	0.160162	1.60001	54.541	0.841667	2.25438	6.30843	6.30036	0.21
D7	2018-07-30	NP	8.55903	1.64628	0.216504	1.60001	54.541	0.841667	2.25438	6.30843	6.30036	0.21
D8	2018-08-19	A	4.27029	1	0	1.5557	52.689	0.7755	2.06815	5.46375	8.28416	0.211
D8	2018-08-19	A	4.99823	1	0	1.5557	52.689	0.7755	2.06815	5.46375	8.28416	0.211
D8	2018-08-19	A	6.35895	1	0	1.5557	52.689	0.7755	2.06815	5.46375	8.28416	0.211
D8	2018-08-19	A	6.38655	1	0	1.5557	52.689	0.7755	2.06815	5.46375	8.28416	0.211
D8	2018-08-19	A	6.13578	1	0	1.5557	52.689	0.7755	2.06815	5.46375	8.28416	0.211
D8	2018-08-19	N	5.39532	0.958324	-0.0184877	1.5557	52.689	0.7755	2.06815	5.46375	8.28416	0.211
D8	2018-08-19	N	7.31798	1.29983	0.113886	1.5557	52.689	0.7755	2.06815	5.46375	8.28416	0.211
D8	2018-08-19	N	5.28086	0.937992	-0.0278009	1.5557	52.689	0.7755	2.06815	5.46375	8.28416	0.211
D8	2018-08-19	N	4.96513	0.881913	-0.0545744	1.5557	52.689	0.7755	2.06815	5.46375	8.28416	0.211
D8	2018-08-19	N	5.04028	0.895261	-0.0480505	1.5557	52.689	0.7755	2.06815	5.46375	8.28416	0.211
D8	2018-08-19	P	5.89704	1.04744	0.0201288	1.5557	52.689	0.7755	2.06815	5.46375	8.28416	0.211
D8	2018-08-19	P	6.95299	1.235	0.0916663	1.5557	52.689	0.7755	2.06815	5.46375	8.28416	0.211
D8	2018-08-19	P	7.04595	1.25151	0.0974346	1.5557	52.689	0.7755	2.06815	5.46375	8.28416	0.211
D8	2018-08-19	P	5.68325	1.00947	0.0040913	1.5557	52.689	0.7755	2.06815	5.46375	8.28416	0.211
D8	2018-08-19	P	6.35619	1.12899	0.0526915	1.5557	52.689	0.7755	2.06815	5.46375	8.28416	0.211
D8	2018-08-19	NP	9.63417	1.71123	0.233309	1.5557	52.689	0.7755	2.06815	5.46375	8.28416	0.211
D8	2018-08-19	NP	9.97775	1.77226	0.248527	1.5557	52.689	0.7755	2.06815	5.46375	8.28416	0.211
D8	2018-08-19	NP	10.5885	1.88075	0.274331	1.5557	52.689	0.7755	2.06815	5.46375	8.28416	0.211
D8	2018-08-19	NP	9.90681	1.75966	0.245429	1.5557	52.689	0.7755	2.06815	5.46375	8.28416	0.211
D8	2018-08-19	NP	10.0371	1.78281	0.251104	1.5557	52.689	0.7755	2.06815	5.46375	8.28416	0.211
D9	2018-09-08	A	5.24131	1	0	1.653	68.6705	1.0815	2.03	3.74905	8.94034	0.214
D9	2018-09-08	A	5.59333	1	0	1.653	68.6705	1.0815	2.03	3.74905	8.94034	0.214
D9	2018-09-08	A	6.20718	1	0	1.653	68.6705	1.0815	2.03	3.74905	8.94034	0.214
D9	2018-09-08	A	6.78653	1	0	1.653	68.6705	1.0815	2.03	3.74905	8.94034	0.214
D9	2018-09-08	A	6.66453	1	0	1.653	68.6705	1.0815	2.03	3.74905	8.94034	0.214
D9	2018-09-08	N	7.98721	1.30968	0.117167	1.653	68.6705	1.0815	2.03	3.74905	8.94034	0.214
D9	2018-09-08	N	6.29264	1.03182	0.0136047	1.653	68.6705	1.0815	2.03	3.74905	8.94034	0.214
D9	2018-09-08	N	9.44496	1.54872	0.189972	1.653	68.6705	1.0815	2.03	3.74905	8.94034	0.214
D9	2018-09-08	N	6.75066	1.10692	0.0441177	1.653	68.6705	1.0815	2.03	3.74905	8.94034	0.214
D9	2018-09-08	N	7.7601	1.27245	0.104639	1.653	68.6705	1.0815	2.03	3.74905	8.94034	0.214
D9	2018-09-08	P	7.95607	1.30458	0.115471	1.653	68.6705	1.0815	2.03	3.74905	8.94034	0.214
D9	2018-09-08	P	8.02155	1.31532	0.11903	1.653	68.6705	1.0815	2.03	3.74905	8.94034	0.214
D9	2018-09-08	P	8.90919	1.46086	0.16461	1.653	68.6705	1.0815	2.03	3.74905	8.94034	0.214
D9	2018-09-08	P	7.94593	1.30292	0.114916	1.653	68.6705	1.0815	2.03	3.74905	8.94034	0.214
D9	2018-09-08	P	8.16017	1.33804	0.126471	1.653	68.6705	1.0815	2.03	3.74905	8.94034	0.214
D9	2018-09-08	NP	10.8301	1.77584	0.249403	1.653	68.6705	1.0815	2.03	3.74905	8.94034	0.214
D9	2018-09-08	NP	11.1609	1.83009	0.262472	1.653	68.6705	1.0815	2.03	3.74905	8.94034	0.214
D9	2018-09-08	NP	10.1043	1.65682	0.219276	1.653	68.6705	1.0815	2.03	3.74905	8.94034	0.214
D9	2018-09-08	NP	9.86507	1.6176	0.208872	1.653	68.6705	1.0815	2.03	3.74905	8.94034	0.214
D9	2018-09-08	NP	9.70309	1.59104	0.201682	1.653	68.6705	1.0815	2.03	3.74905	8.94034	0.214
D10	2018-09-28	A	5.66279	1	0	1.72265	83.471	1.0205	2.46	2.84875	8.22052	0.214
D10	2018-09-28	A	7.16093	1	0	1.72265	83.471	1.0205	2.46	2.84875	8.22052	0.214
D10	2018-09-28	A	5.20774	1	0	1.72265	83.471	1.0205	2.46	2.84875	8.22052	0.214
D10	2018-09-28	A	7.27583	1	0	1.72265	83.471	1.0205	2.46	2.84875	8.22052	0.214
D10	2018-09-28	A	4.9442	1	0	1.72265	83.471	1.0205	2.46	2.84875	8.22052	0.214
D10	2018-09-28	N	9.30701	1.53827	0.187033	1.72265	83.471	1.0205	2.46	2.84875	8.22052	0.214
D10	2018-09-28	N	9.82358	1.62365	0.210493	1.72265	83.471	1.0205	2.46	2.84875	8.22052	0.214
D10	2018-09-28	N	9.93499	1.64207	0.215391	1.72265	83.471	1.0205	2.46	2.84875	8.22052	0.214
D10	2018-09-28	N	8.92423	1.47501	0.168794	1.72265	83.471	1.0205	2.46	2.84875	8.22052	0.214
D10	2018-09-28	N	7.72593	1.27695	0.106174	1.72265	83.471	1.0205	2.46	2.84875	8.22052	0.214
D10	2018-09-28	P	7.75065	1.28104	0.107561	1.72265	83.471	1.0205	2.46	2.84875	8.22052	0.214
D10	2018-09-28	P	5.76022	0.952055	-0.0213379	1.72265	83.471	1.0205	2.46	2.84875	8.22052	0.214
D10	2018-09-28	P	6.28116	1.03816	0.016263	1.72265	83.471	1.0205	2.46	2.84875	8.22052	0.214
D10	2018-09-28	P	6.53124	1.07949	0.0332186	1.72265	83.471	1.0205	2.46	2.84875	8.22052	0.214
D10	2018-09-28	P	8.7729	1.44999	0.161366	1.72265	83.471	1.0205	2.46	2.84875	8.22052	0.214
D10	2018-09-28	NP	8.55912	1.41466	0.150652	1.72265	83.471	1.0205	2.46	2.84875	8.22052	0.214
D10	2018-09-28	NP	7.50467	1.24038	0.0935547	1.72265	83.471	1.0205	2.46	2.84875	8.22052	0.214
D10	2018-09-28	NP	8.40186	1.38867	0.142599	1.72265	83.471	1.0205	2.46	2.84875	8.22052	0.214
D10	2018-09-28	NP	10.0703	1.66443	0.221266	1.72265	83.471	1.0205	2.46	2.84875	8.22052	0.214
D10	2018-09-28	NP	6.98121	1.15386	0.0621537	1.72265	83.471	1.0205	2.46	2.84875	8.22052	0.214

## Sheet: Respiration
Deployment	Date	Treatment	Respiration	Res.RR	log(RRx)	DOC	DIN	SRP	TP	DPF	meanT	Depth
D1	2018-03-28	A	-5.53475	1	0	1.31607	197.311	4.203	5.57642	0.177813	0.336354	0.183
D1	2018-03-28	A	-4.54785	1	0	1.31607	197.311	4.203	5.57642	0.177813	0.336354	0.183
D1	2018-03-28	A	-4.24849	1	0	1.31607	197.311	4.203	5.57642	0.177813	0.336354	0.183
D1	2018-03-28	A	-4.73217	1	0	1.31607	197.311	4.203	5.57642	0.177813	0.336354	0.183
D1	2018-03-28	A	-4.61577	1	0	1.31607	197.311	4.203	5.57642	0.177813	0.336354	0.183
D1	2018-03-28	N	-5.66599	1.19642	0.0778824	1.31607	197.311	4.203	5.57642	0.177813	0.336354	0.183
D1	2018-03-28	N	-4.1522	0.876767	-0.0571158	1.31607	197.311	4.203	5.57642	0.177813	0.336354	0.183
D1	2018-03-28	N	-5.24969	1.10851	0.04474	1.31607	197.311	4.203	5.57642	0.177813	0.336354	0.183
D1	2018-03-28	N	-4.69728	0.991866	-0.00354696	1.31607	197.311	4.203	5.57642	0.177813	0.336354	0.183
D1	2018-03-28	N	-4.94129	1.04339	0.0184467	1.31607	197.311	4.203	5.57642	0.177813	0.336354	0.183
D1	2018-03-28	P	-3.71578	0.784614	-0.105344	1.31607	197.311	4.203	5.57642	0.177813	0.336354	0.183
D1	2018-03-28	P	-3.19732	0.675138	-0.170607	1.31607	197.311	4.203	5.57642	0.177813	0.336354	0.183
D1	2018-03-28	P	-3.81782	0.80616	-0.0935788	1.31607	197.311	4.203	5.57642	0.177813	0.336354	0.183
D1	2018-03-28	P	-4.24048	0.895408	-0.0479788	1.31607	197.311	4.203	5.57642	0.177813	0.336354	0.183
D1	2018-03-28	P	-4.38181	0.925252	-0.0337398	1.31607	197.311	4.203	5.57642	0.177813	0.336354	0.183
D1	2018-03-28	NP	-3.96061	0.836312	-0.0776319	1.31607	197.311	4.203	5.57642	0.177813	0.336354	0.183
D1	2018-03-28	NP	-5.21927	1.10209	0.0422156	1.31607	197.311	4.203	5.57642	0.177813	0.336354	0.183
D1	2018-03-28	NP	-4.87679	1.02977	0.0127404	1.31607	197.311	4.203	5.57642	0.177813	0.336354	0.183
D1	2018-03-28	NP	-5.04102	1.06445	0.0271244	1.31607	197.311	4.203	5.57642	0.177813	0.336354	0.183
D1	2018-03-28	NP	-5.51878	1.16533	0.0664493	1.31607	197.311	4.203	5.57642	0.177813	0.336354	0.183
D1	2018-03-28	C	-5.50288	1.16197	0.065196	1.31607	197.311	4.203	5.57642	0.177813	0.336354	0.183
D1	2018-03-28	C	-5.92901	1.25195	0.0975885	1.31607	197.311	4.203	5.57642	0.177813	0.336354	0.183
D1	2018-03-28	C	-4.93944	1.043	0.0182844	1.31607	197.311	4.203	5.57642	0.177813	0.336354	0.183
D1	2018-03-28	C	-5.72955	1.20984	0.0827266	1.31607	197.311	4.203	5.57642	0.177813	0.336354	0.183
D1	2018-03-28	C	-5.30315	1.1198	0.04914	1.31607	197.311	4.203	5.57642	0.177813	0.336354	0.183
D1	2018-03-28	CNP	-4.97561	1.05064	0.0214529	1.31607	197.311	4.203	5.57642	0.177813	0.336354	0.183
D1	2018-03-28	CNP	-4.14289	0.874801	-0.0580908	1.31607	197.311	4.203	5.57642	0.177813	0.336354	0.183
D1	2018-03-28	CNP	-3.69942	0.78116	-0.10726	1.31607	197.311	4.203	5.57642	0.177813	0.336354	0.183
D1	2018-03-28	CNP	-3.13804	0.66262	-0.178736	1.31607	197.311	4.203	5.57642	0.177813	0.336354	0.183
D1	2018-03-28	CNP	-5.89018	1.24376	0.0947349	1.31607	197.311	4.203	5.57642	0.177813	0.336354	0.183
D3	2018-05-07	A	-1.95344	1	0	1.69682	217.018	2.6445	4.26614	9.27641	1.7358	0.184
D3	2018-05-07	A	-3.79136	1	0	1.69682	217.018	2.6445	4.26614	9.27641	1.7358	0.184
D3	2018-05-07	A	-4.37042	1	0	1.69682	217.018	2.6445	4.26614	9.27641	1.7358	0.184
D3	2018-05-07	A	-4.66524	1	0	1.69682	217.018	2.6445	4.26614	9.27641	1.7358	0.184
D3	2018-05-07	A	-4.72627	1	0	1.69682	217.018	2.6445	4.26614	9.27641	1.7358	0.184
D3	2018-05-07	N	-3.94291	1.01065	0.00460263	1.69682	217.018	2.6445	4.26614	9.27641	1.7358	0.184
D3	2018-05-07	N	-5.80601	1.48821	0.172663	1.69682	217.018	2.6445	4.26614	9.27641	1.7358	0.184
D3	2018-05-07	N	-3.90262	1.00033	0.000141754	1.69682	217.018	2.6445	4.26614	9.27641	1.7358	0.184
D3	2018-05-07	N	-4.44951	1.1405	0.057097	1.69682	217.018	2.6445	4.26614	9.27641	1.7358	0.184
D3	2018-05-07	N	-4.94964	1.2687	0.103359	1.69682	217.018	2.6445	4.26614	9.27641	1.7358	0.184
D3	2018-05-07	P	-4.77017	1.2227	0.0873193	1.69682	217.018	2.6445	4.26614	9.27641	1.7358	0.184
D3	2018-05-07	P	-5.42814	1.39135	0.143436	1.69682	217.018	2.6445	4.26614	9.27641	1.7358	0.184
D3	2018-05-07	P	-4.72375	1.2108	0.0830722	1.69682	217.018	2.6445	4.26614	9.27641	1.7358	0.184
D3	2018-05-07	P	-4.9319	1.26415	0.1018	1.69682	217.018	2.6445	4.26614	9.27641	1.7358	0.184
D3	2018-05-07	P	-4.747	1.21676	0.0852044	1.69682	217.018	2.6445	4.26614	9.27641	1.7358	0.184
D3	2018-05-07	NP	-5.79442	1.48524	0.171795	1.69682	217.018	2.6445	4.26614	9.27641	1.7358	0.184
D3	2018-05-07	NP	-6.01876	1.54274	0.188292	1.69682	217.018	2.6445	4.26614	9.27641	1.7358	0.184
D3	2018-05-07	NP	-6.65297	1.7053	0.231801	1.69682	217.018	2.6445	4.26614	9.27641	1.7358	0.184
D3	2018-05-07	NP	-6.71856	1.72211	0.236061	1.69682	217.018	2.6445	4.26614	9.27641	1.7358	0.184
D3	2018-05-07	NP	-6.46233	1.65644	0.219175	1.69682	217.018	2.6445	4.26614	9.27641	1.7358	0.184
D3	2018-05-07	C	-5.93813	1.52207	0.182435	1.69682	217.018	2.6445	4.26614	9.27641	1.7358	0.184
D3	2018-05-07	C	-5.32129	1.36396	0.134802	1.69682	217.018	2.6445	4.26614	9.27641	1.7358	0.184
D3	2018-05-07	C	-5.78727	1.4834	0.171259	1.69682	217.018	2.6445	4.26614	9.27641	1.7358	0.184
D3	2018-05-07	C	-5.72954	1.4686	0.166905	1.69682	217.018	2.6445	4.26614	9.27641	1.7358	0.184
D3	2018-05-07	C	-6.13775	1.57324	0.196795	1.69682	217.018	2.6445	4.26614	9.27641	1.7358	0.184
D3	2018-05-07	CNP	-7.60316	1.94886	0.28978	1.69682	217.018	2.6445	4.26614	9.27641	1.7358	0.184
D3	2018-05-07	CNP	-7.94447	2.03634	0.30885	1.69682	217.018	2.6445	4.26614	9.27641	1.7358	0.184
D3	2018-05-07	CNP	-8.4792	2.1734	0.33714	1.69682	217.018	2.6445	4.26614	9.27641	1.7358	0.184
D3	2018-05-07	CNP	-9.0438	2.31812	0.365136	1.69682	217.018	2.6445	4.26614	9.27641	1.7358	0.184
D3	2018-05-07	CNP	-8.48961	2.17607	0.337673	1.69682	217.018	2.6445	4.26614	9.27641	1.7358	0.184
D4	2018-05-27	A	-2.90153	1	0	2.136	175.904	0.958	3.14436	9.46536	1.95834	0.214
D4	2018-05-27	A	-3.4027	1	0	2.136	175.904	0.958	3.14436	9.46536	1.95834	0.214
D4	2018-05-27	A	-3.76244	1	0	2.136	175.904	0.958	3.14436	9.46536	1.95834	0.214
D4	2018-05-27	A	-3.30434	1	0	2.136	175.904	0.958	3.14436	9.46536	1.95834	0.214
D4	2018-05-27	A	-3.37515	1	0	2.136	175.904	0.958	3.14436	9.46536	1.95834	0.214
D4	2018-05-27	N	-4.02867	1.20286	0.0802168	2.136	175.904	0.958	3.14436	9.46536	1.95834	0.214
D4	2018-05-27	N	-2.29661	0.685713	-0.163858	2.136	175.904	0.958	3.14436	9.46536	1.95834	0.214
D4	2018-05-27	N	-5.01461	1.49724	0.175292	2.136	175.904	0.958	3.14436	9.46536	1.95834	0.214
D4	2018-05-27	N	-2.52672	0.754418	-0.122388	2.136	175.904	0.958	3.14436	9.46536	1.95834	0.214
D4	2018-05-27	N	-4.70353	1.40436	0.147478	2.136	175.904	0.958	3.14436	9.46536	1.95834	0.214
D4	2018-05-27	P	-4.38382	1.3089	0.116907	2.136	175.904	0.958	3.14436	9.46536	1.95834	0.214
D4	2018-05-27	P	-5.01754	1.49812	0.175546	2.136	175.904	0.958	3.14436	9.46536	1.95834	0.214
D4	2018-05-27	P	-5.08367	1.51786	0.181232	2.136	175.904	0.958	3.14436	9.46536	1.95834	0.214
D4	2018-05-27	P	-4.71806	1.4087	0.148819	2.136	175.904	0.958	3.14436	9.46536	1.95834	0.214
D4	2018-05-27	P	-4.57793	1.36686	0.135724	2.136	175.904	0.958	3.14436	9.46536	1.95834	0.214
D4	2018-05-27	NP	-10.1999	3.04543	0.483649	2.136	175.904	0.958	3.14436	9.46536	1.95834	0.214
D4	2018-05-27	NP	-9.80857	2.9286	0.466661	2.136	175.904	0.958	3.14436	9.46536	1.95834	0.214
D4	2018-05-27	NP	-10.3888	3.10184	0.491619	2.136	175.904	0.958	3.14436	9.46536	1.95834	0.214
D4	2018-05-27	NP	-10.1549	3.032	0.481729	2.136	175.904	0.958	3.14436	9.46536	1.95834	0.214
D4	2018-05-27	NP	-11.5123	3.4373	0.536218	2.136	175.904	0.958	3.14436	9.46536	1.95834	0.214
D4	2018-05-27	C	-5.08227	1.51744	0.181112	2.136	175.904	0.958	3.14436	9.46536	1.95834	0.214
D4	2018-05-27	C	-5.26677	1.57253	0.196599	2.136	175.904	0.958	3.14436	9.46536	1.95834	0.214
D4	2018-05-27	C	-5.73184	1.71139	0.233349	2.136	175.904	0.958	3.14436	9.46536	1.95834	0.214
D4	2018-05-27	C	-5.27995	1.57647	0.197685	2.136	175.904	0.958	3.14436	9.46536	1.95834	0.214
D4	2018-05-27	C	-5.3686	1.60294	0.204916	2.136	175.904	0.958	3.14436	9.46536	1.95834	0.214
D4	2018-05-27	CNP	-12.308	3.67487	0.565242	2.136	175.904	0.958	3.14436	9.46536	1.95834	0.214
D4	2018-05-27	CNP	-14.1993	4.23957	0.627322	2.136	175.904	0.958	3.14436	9.46536	1.95834	0.214
D4	2018-05-27	CNP	-12.5402	3.74421	0.57336	2.136	175.904	0.958	3.14436	9.46536	1.95834	0.214
D4	2018-05-27	CNP	-14.2658	4.25943	0.629352	2.136	175.904	0.958	3.14436	9.46536	1.95834	0.214
D4	2018-05-27	CNP	-13.2047	3.9426	0.595783	2.136	175.904	0.958	3.14436	9.46536	1.95834	0.214
D5	2018-06-20	A	-1.48945	1	0	2.26243	76.691	1.842	4.19889	7.21716	2.27325	0.259
D5	2018-06-20	A	-1.96395	1	0	2.26243	76.691	1.842	4.19889	7.21716	2.27325	0.259
D5	2018-06-20	A	-2.01273	1	0	2.26243	76.691	1.842	4.19889	7.21716	2.27325	0.259
D5	2018-06-20	A	-1.4774	1	0	2.26243	76.691	1.842	4.19889	7.21716	2.27325	0.259
D5	2018-06-20	A	-3.16835	1	0	2.26243	76.691	1.842	4.19889	7.21716	2.27325	0.259
D5	2018-06-20	N	-3.93508	1.94577	0.289092	2.26243	76.691	1.842	4.19889	7.21716	2.27325	0.259
D5	2018-06-20	N	-3.8777	1.9174	0.282712	2.26243	76.691	1.842	4.19889	7.21716	2.27325	0.259
D5	2018-06-20	N	-3.22277	1.59356	0.202368	2.26243	76.691	1.842	4.19889	7.21716	2.27325	0.259
D5	2018-06-20	N	-2.35966	1.16678	0.0669888	2.26243	76.691	1.842	4.19889	7.21716	2.27325	0.259
D5	2018-06-20	N	-5.07511	2.50948	0.399584	2.26243	76.691	1.842	4.19889	7.21716	2.27325	0.259
D5	2018-06-20	P	-3.57663	1.76853	0.247612	2.26243	76.691	1.842	4.19889	7.21716	2.27325	0.259
D5	2018-06-20	P	-2.52122	1.24666	0.0957496	2.26243	76.691	1.842	4.19889	7.21716	2.27325	0.259
D5	2018-06-20	P	-3.50543	1.73333	0.23888	2.26243	76.691	1.842	4.19889	7.21716	2.27325	0.259
D5	2018-06-20	P	-3.49482	1.72808	0.237564	2.26243	76.691	1.842	4.19889	7.21716	2.27325	0.259
D5	2018-06-20	P	-4.04906	2.00213	0.301493	2.26243	76.691	1.842	4.19889	7.21716	2.27325	0.259
D5	2018-06-20	NP	-10.0951	4.99171	0.698249	2.26243	76.691	1.842	4.19889	7.21716	2.27325	0.259
D5	2018-06-20	NP	-10.2695	5.07797	0.70569	2.26243	76.691	1.842	4.19889	7.21716	2.27325	0.259
D5	2018-06-20	NP	-8.75505	4.3291	0.636397	2.26243	76.691	1.842	4.19889	7.21716	2.27325	0.259
D5	2018-06-20	NP	-11.292	5.58355	0.746911	2.26243	76.691	1.842	4.19889	7.21716	2.27325	0.259
D5	2018-06-20	NP	-10.5477	5.21551	0.717296	2.26243	76.691	1.842	4.19889	7.21716	2.27325	0.259
D5	2018-06-20	C	-4.2969	2.12468	0.327293	2.26243	76.691	1.842	4.19889	7.21716	2.27325	0.259
D5	2018-06-20	C	-4.90352	2.42464	0.384646	2.26243	76.691	1.842	4.19889	7.21716	2.27325	0.259
D5	2018-06-20	C	-4.52043	2.23521	0.349318	2.26243	76.691	1.842	4.19889	7.21716	2.27325	0.259
D5	2018-06-20	C	-5.6989	2.81793	0.44993	2.26243	76.691	1.842	4.19889	7.21716	2.27325	0.259
D5	2018-06-20	C	-6.78126	3.35312	0.525449	2.26243	76.691	1.842	4.19889	7.21716	2.27325	0.259
D5	2018-06-20	CNP	-12.8684	6.36302	0.803663	2.26243	76.691	1.842	4.19889	7.21716	2.27325	0.259
D5	2018-06-20	CNP	-14.6708	7.25426	0.860593	2.26243	76.691	1.842	4.19889	7.21716	2.27325	0.259
D5	2018-06-20	CNP	-14.9892	7.41171	0.869918	2.26243	76.691	1.842	4.19889	7.21716	2.27325	0.259
D5	2018-06-20	CNP	-15.7151	7.77064	0.890457	2.26243	76.691	1.842	4.19889	7.21716	2.27325	0.259
D5	2018-06-20	CNP	-12.5059	6.18375	0.791252	2.26243	76.691	1.842	4.19889	7.21716	2.27325	0.259
D6	2018-07-10	A	-2.31148	1	0	2.16976	62.2283	1.45133	3.21636	5.928	4.156	0.243
D6	2018-07-10	A	-2.64214	1	0	2.16976	62.2283	1.45133	3.21636	5.928	4.156	0.243
D6	2018-07-10	A	-3.26604	1	0	2.16976	62.2283	1.45133	3.21636	5.928	4.156	0.243
D6	2018-07-10	A	-2.84081	1	0	2.16976	62.2283	1.45133	3.21636	5.928	4.156	0.243
D6	2018-07-10	A	-2.812	1	0	2.16976	62.2283	1.45133	3.21636	5.928	4.156	0.243
D6	2018-07-10	N	-4.07077	1.46721	0.166493	2.16976	62.2283	1.45133	3.21636	5.928	4.156	0.243
D6	2018-07-10	N	-4.15935	1.49914	0.175841	2.16976	62.2283	1.45133	3.21636	5.928	4.156	0.243
D6	2018-07-10	N	-5.79961	2.09033	0.320215	2.16976	62.2283	1.45133	3.21636	5.928	4.156	0.243
D6	2018-07-10	N	-4.43268	1.59765	0.203482	2.16976	62.2283	1.45133	3.21636	5.928	4.156	0.243
D6	2018-07-10	N	-3.62965	1.30822	0.116681	2.16976	62.2283	1.45133	3.21636	5.928	4.156	0.243
D6	2018-07-10	P	-5.51264	1.9869	0.298175	2.16976	62.2283	1.45133	3.21636	5.928	4.156	0.243
D6	2018-07-10	P	-5.34203	1.92541	0.284522	2.16976	62.2283	1.45133	3.21636	5.928	4.156	0.243
D6	2018-07-10	P	-5.15609	1.85839	0.269137	2.16976	62.2283	1.45133	3.21636	5.928	4.156	0.243
D6	2018-07-10	P	-4.34436	1.56582	0.194742	2.16976	62.2283	1.45133	3.21636	5.928	4.156	0.243
D6	2018-07-10	P	-3.80913	1.37291	0.137642	2.16976	62.2283	1.45133	3.21636	5.928	4.156	0.243
D6	2018-07-10	NP	-13.833	4.98576	0.697732	2.16976	62.2283	1.45133	3.21636	5.928	4.156	0.243
D6	2018-07-10	NP	-13.1381	4.73532	0.675349	2.16976	62.2283	1.45133	3.21636	5.928	4.156	0.243
D6	2018-07-10	NP	-11.5793	4.17348	0.620498	2.16976	62.2283	1.45133	3.21636	5.928	4.156	0.243
D6	2018-07-10	NP	-12.2971	4.43219	0.646618	2.16976	62.2283	1.45133	3.21636	5.928	4.156	0.243
D6	2018-07-10	NP	-13.3387	4.80763	0.681931	2.16976	62.2283	1.45133	3.21636	5.928	4.156	0.243
D6	2018-07-10	C	-4.87803	1.75817	0.24506	2.16976	62.2283	1.45133	3.21636	5.928	4.156	0.243
D6	2018-07-10	C	-5.25608	1.89443	0.277478	2.16976	62.2283	1.45133	3.21636	5.928	4.156	0.243
D6	2018-07-10	C	-7.0233	2.53138	0.403357	2.16976	62.2283	1.45133	3.21636	5.928	4.156	0.243
D6	2018-07-10	C	-6.31463	2.27595	0.357164	2.16976	62.2283	1.45133	3.21636	5.928	4.156	0.243
D6	2018-07-10	C	-5.46641	1.97023	0.294518	2.16976	62.2283	1.45133	3.21636	5.928	4.156	0.243
D6	2018-07-10	CNP	-15.4048	5.5523	0.744473	2.16976	62.2283	1.45133	3.21636	5.928	4.156	0.243
D6	2018-07-10	CNP	-15.7386	5.67258	0.753781	2.16976	62.2283	1.45133	3.21636	5.928	4.156	0.243
D6	2018-07-10	CNP	-14.4875	5.22167	0.71781	2.16976	62.2283	1.45133	3.21636	5.928	4.156	0.243
D6	2018-07-10	CNP	-16.1265	5.8124	0.764356	2.16976	62.2283	1.45133	3.21636	5.928	4.156	0.243
D6	2018-07-10	CNP	-16.4206	5.9184	0.772204	2.16976	62.2283	1.45133	3.21636	5.928	4.156	0.243
D7	2018-07-30	A	-4.87497	1	0	1.60001	54.541	0.841667	2.25438	6.30843	6.30036	0.21
D7	2018-07-30	A	-3.98544	1	0	1.60001	54.541	0.841667	2.25438	6.30843	6.30036	0.21
D7	2018-07-30	A	-3.91883	1	0	1.60001	54.541	0.841667	2.25438	6.30843	6.30036	0.21
D7	2018-07-30	A	-3.86942	1	0	1.60001	54.541	0.841667	2.25438	6.30843	6.30036	0.21
D7	2018-07-30	A	-3.76624	1	0	1.60001	54.541	0.841667	2.25438	6.30843	6.30036	0.21
D7	2018-07-30	N	-3.13508	0.767842	-0.114728	1.60001	54.541	0.841667	2.25438	6.30843	6.30036	0.21
D7	2018-07-30	N	-3.19827	0.783316	-0.106063	1.60001	54.541	0.841667	2.25438	6.30843	6.30036	0.21
D7	2018-07-30	N	-2.53127	0.619957	-0.207639	1.60001	54.541	0.841667	2.25438	6.30843	6.30036	0.21
D7	2018-07-30	N	-3.98424	0.975815	-0.0106323	1.60001	54.541	0.841667	2.25438	6.30843	6.30036	0.21
D7	2018-07-30	N	-4.00445	0.980767	-0.00843421	1.60001	54.541	0.841667	2.25438	6.30843	6.30036	0.21
D7	2018-07-30	P	-3.4462	0.844039	-0.0736375	1.60001	54.541	0.841667	2.25438	6.30843	6.30036	0.21
D7	2018-07-30	P	-3.65547	0.895294	-0.0480346	1.60001	54.541	0.841667	2.25438	6.30843	6.30036	0.21
D7	2018-07-30	P	-4.08985	1.00168	0.000729767	1.60001	54.541	0.841667	2.25438	6.30843	6.30036	0.21
D7	2018-07-30	P	-4.27276	1.04648	0.0197311	1.60001	54.541	0.841667	2.25438	6.30843	6.30036	0.21
D7	2018-07-30	P	-3.31595	0.812139	-0.0903694	1.60001	54.541	0.841667	2.25438	6.30843	6.30036	0.21
D7	2018-07-30	NP	-10.4527	2.56006	0.408251	1.60001	54.541	0.841667	2.25438	6.30843	6.30036	0.21
D7	2018-07-30	NP	-12.0512	2.95156	0.470051	1.60001	54.541	0.841667	2.25438	6.30843	6.30036	0.21
D7	2018-07-30	NP	-9.52803	2.33359	0.368025	1.60001	54.541	0.841667	2.25438	6.30843	6.30036	0.21
D7	2018-07-30	NP	-10.7657	2.63672	0.421064	1.60001	54.541	0.841667	2.25438	6.30843	6.30036	0.21
D7	2018-07-30	NP	-9.83498	2.40877	0.381796	1.60001	54.541	0.841667	2.25438	6.30843	6.30036	0.21
D7	2018-07-30	C	-4.53821	1.11149	0.0459067	1.60001	54.541	0.841667	2.25438	6.30843	6.30036	0.21
D7	2018-07-30	C	-4.7078	1.15303	0.0618405	1.60001	54.541	0.841667	2.25438	6.30843	6.30036	0.21
D7	2018-07-30	C	-5.05561	1.23821	0.0927957	1.60001	54.541	0.841667	2.25438	6.30843	6.30036	0.21
D7	2018-07-30	C	-4.67378	1.1447	0.0586907	1.60001	54.541	0.841667	2.25438	6.30843	6.30036	0.21
D7	2018-07-30	C	-4.75215	1.16389	0.0659126	1.60001	54.541	0.841667	2.25438	6.30843	6.30036	0.21
D7	2018-07-30	CNP	-11.8351	2.89863	0.462193	1.60001	54.541	0.841667	2.25438	6.30843	6.30036	0.21
D7	2018-07-30	CNP	-12.6238	3.0918	0.490212	1.60001	54.541	0.841667	2.25438	6.30843	6.30036	0.21
D7	2018-07-30	CNP	-13.0903	3.20606	0.505972	1.60001	54.541	0.841667	2.25438	6.30843	6.30036	0.21
D7	2018-07-30	CNP	-12.5477	3.07317	0.487586	1.60001	54.541	0.841667	2.25438	6.30843	6.30036	0.21
D7	2018-07-30	CNP	-12.0966	2.96269	0.471687	1.60001	54.541	0.841667	2.25438	6.30843	6.30036	0.21
D8	2018-08-19	A	-2.97368	1	0	1.5557	52.689	0.7755	2.06815	5.46375	8.28416	0.211
D8	2018-08-19	A	-3.25737	1	0	1.5557	52.689	0.7755	2.06815	5.46375	8.28416	0.211
D8	2018-08-19	A	-2.06842	1	0	1.5557	52.689	0.7755	2.06815	5.46375	8.28416	0.211
D8	2018-08-19	A	-2.35538	1	0	1.5557	52.689	0.7755	2.06815	5.46375	8.28416	0.211
D8	2018-08-19	A	-2.63822	1	0	1.5557	52.689	0.7755	2.06815	5.46375	8.28416	0.211
D8	2018-08-19	N	-4.41645	1.66118	0.220418	1.5557	52.689	0.7755	2.06815	5.46375	8.28416	0.211
D8	2018-08-19	N	-3.6211	1.36202	0.134185	1.5557	52.689	0.7755	2.06815	5.46375	8.28416	0.211
D8	2018-08-19	N	-3.60693	1.35669	0.132482	1.5557	52.689	0.7755	2.06815	5.46375	8.28416	0.211
D8	2018-08-19	N	-3.78405	1.42332	0.153301	1.5557	52.689	0.7755	2.06815	5.46375	8.28416	0.211
D8	2018-08-19	N	-5.96856	2.24499	0.351214	1.5557	52.689	0.7755	2.06815	5.46375	8.28416	0.211
D8	2018-08-19	P	-4.63717	1.7442	0.241597	1.5557	52.689	0.7755	2.06815	5.46375	8.28416	0.211
D8	2018-08-19	P	-5.33784	2.00775	0.30271	1.5557	52.689	0.7755	2.06815	5.46375	8.28416	0.211
D8	2018-08-19	P	-5.60461	2.10809	0.32389	1.5557	52.689	0.7755	2.06815	5.46375	8.28416	0.211
D8	2018-08-19	P	-4.26737	1.60511	0.205504	1.5557	52.689	0.7755	2.06815	5.46375	8.28416	0.211
D8	2018-08-19	P	-5.15208	1.93788	0.287327	1.5557	52.689	0.7755	2.06815	5.46375	8.28416	0.211
D8	2018-08-19	NP	-12.0082	4.51671	0.654823	1.5557	52.689	0.7755	2.06815	5.46375	8.28416	0.211
D8	2018-08-19	NP	-11.5968	4.36197	0.639683	1.5557	52.689	0.7755	2.06815	5.46375	8.28416	0.211
D8	2018-08-19	NP	-12.5702	4.72811	0.674687	1.5557	52.689	0.7755	2.06815	5.46375	8.28416	0.211
D8	2018-08-19	NP	-13.4848	5.07212	0.705189	1.5557	52.689	0.7755	2.06815	5.46375	8.28416	0.211
D8	2018-08-19	NP	-11.6535	4.38328	0.6418	1.5557	52.689	0.7755	2.06815	5.46375	8.28416	0.211
D8	2018-08-19	C	-4.38644	1.64989	0.217456	1.5557	52.689	0.7755	2.06815	5.46375	8.28416	0.211
D8	2018-08-19	C	-5.9618	2.24244	0.350722	1.5557	52.689	0.7755	2.06815	5.46375	8.28416	0.211
D8	2018-08-19	C	-5.52562	2.07838	0.317726	1.5557	52.689	0.7755	2.06815	5.46375	8.28416	0.211
D8	2018-08-19	C	-3.99762	1.50365	0.177146	1.5557	52.689	0.7755	2.06815	5.46375	8.28416	0.211
D8	2018-08-19	C	-5.31295	1.99839	0.30068	1.5557	52.689	0.7755	2.06815	5.46375	8.28416	0.211
D8	2018-08-19	CNP	-14.7078	5.53214	0.742893	1.5557	52.689	0.7755	2.06815	5.46375	8.28416	0.211
D8	2018-08-19	CNP	-15.7711	5.93208	0.773207	1.5557	52.689	0.7755	2.06815	5.46375	8.28416	0.211
D8	2018-08-19	CNP	-15.1233	5.68842	0.754991	1.5557	52.689	0.7755	2.06815	5.46375	8.28416	0.211
D8	2018-08-19	CNP	-14.3745	5.40675	0.732936	1.5557	52.689	0.7755	2.06815	5.46375	8.28416	0.211
D8	2018-08-19	CNP	-14.9024	5.60531	0.748599	1.5557	52.689	0.7755	2.06815	5.46375	8.28416	0.211
D9	2018-09-08	A	-2.84655	1	0	1.653	68.6705	1.0815	2.03204	3.74905	8.94034	0.214
D9	2018-09-08	A	-4.05763	1	0	1.653	68.6705	1.0815	2.03204	3.74905	8.94034	0.214
D9	2018-09-08	A	-3.44354	1	0	1.653	68.6705	1.0815	2.03204	3.74905	8.94034	0.214
D9	2018-09-08	A	-3.47877	1	0	1.653	68.6705	1.0815	2.03204	3.74905	8.94034	0.214
D9	2018-09-08	A	-3.76916	1	0	1.653	68.6705	1.0815	2.03204	3.74905	8.94034	0.214
D9	2018-09-08	N	-4.56756	1.29792	0.113249	1.653	68.6705	1.0815	2.03204	3.74905	8.94034	0.214
D9	2018-09-08	N	-4.62256	1.31355	0.118447	1.653	68.6705	1.0815	2.03204	3.74905	8.94034	0.214
D9	2018-09-08	N	-5.1264	1.45672	0.163377	1.653	68.6705	1.0815	2.03204	3.74905	8.94034	0.214
D9	2018-09-08	N	-8.01927	2.27877	0.3577	1.653	68.6705	1.0815	2.03204	3.74905	8.94034	0.214
D9	2018-09-08	N	-5.52446	1.56984	0.195855	1.653	68.6705	1.0815	2.03204	3.74905	8.94034	0.214
D9	2018-09-08	P	-4.75527	1.35126	0.13074	1.653	68.6705	1.0815	2.03204	3.74905	8.94034	0.214
D9	2018-09-08	P	-5.32059	1.5119	0.179524	1.653	68.6705	1.0815	2.03204	3.74905	8.94034	0.214
D9	2018-09-08	P	-4.67225	1.32767	0.123091	1.653	68.6705	1.0815	2.03204	3.74905	8.94034	0.214
D9	2018-09-08	P	-4.266	1.21223	0.0835858	1.653	68.6705	1.0815	2.03204	3.74905	8.94034	0.214
D9	2018-09-08	P	-4.63495	1.31707	0.119609	1.653	68.6705	1.0815	2.03204	3.74905	8.94034	0.214
D9	2018-09-08	NP	-12.22	3.47246	0.540637	1.653	68.6705	1.0815	2.03204	3.74905	8.94034	0.214
D9	2018-09-08	NP	-13.5368	3.84663	0.58508	1.653	68.6705	1.0815	2.03204	3.74905	8.94034	0.214
D9	2018-09-08	NP	-12.5309	3.5608	0.551547	1.653	68.6705	1.0815	2.03204	3.74905	8.94034	0.214
D9	2018-09-08	NP	-9.69149	2.75394	0.439955	1.653	68.6705	1.0815	2.03204	3.74905	8.94034	0.214
D9	2018-09-08	NP	-13.1327	3.73181	0.57192	1.653	68.6705	1.0815	2.03204	3.74905	8.94034	0.214
D9	2018-09-08	C	-5.75327	1.63485	0.213479	1.653	68.6705	1.0815	2.03204	3.74905	8.94034	0.214
D9	2018-09-08	C	-5.36382	1.52419	0.183039	1.653	68.6705	1.0815	2.03204	3.74905	8.94034	0.214
D9	2018-09-08	C	-5.18476	1.47331	0.168294	1.653	68.6705	1.0815	2.03204	3.74905	8.94034	0.214
D9	2018-09-08	C	-4.98316	1.41602	0.15107	1.653	68.6705	1.0815	2.03204	3.74905	8.94034	0.214
D9	2018-09-08	C	-5.66941	1.61103	0.207103	1.653	68.6705	1.0815	2.03204	3.74905	8.94034	0.214
D9	2018-09-08	CNP	-14.0652	3.99678	0.601711	1.653	68.6705	1.0815	2.03204	3.74905	8.94034	0.214
D9	2018-09-08	CNP	-15.1883	4.31593	0.635074	1.653	68.6705	1.0815	2.03204	3.74905	8.94034	0.214
D9	2018-09-08	CNP	-14.9707	4.2541	0.628808	1.653	68.6705	1.0815	2.03204	3.74905	8.94034	0.214
D9	2018-09-08	CNP	-14.4299	4.10041	0.612827	1.653	68.6705	1.0815	2.03204	3.74905	8.94034	0.214
D9	2018-09-08	CNP	-14.8449	4.21834	0.625142	1.653	68.6705	1.0815	2.03204	3.74905	8.94034	0.214
D10	2018-09-28	A	-3.14114	1	0	1.72265	83.471	1.0205	2.45805	2.84875	8.22052	0.214
D10	2018-09-28	A	-3.39684	1	0	1.72265	83.471	1.0205	2.45805	2.84875	8.22052	0.214
D10	2018-09-28	A	-3.46093	1	0	1.72265	83.471	1.0205	2.45805	2.84875	8.22052	0.214
D10	2018-09-28	A	-3.18851	1	0	1.72265	83.471	1.0205	2.45805	2.84875	8.22052	0.214
D10	2018-09-28	A	-3.36885	1	0	1.72265	83.471	1.0205	2.45805	2.84875	8.22052	0.214
D10	2018-09-28	N	-6.58639	1.98909	0.298655	1.72265	83.471	1.0205	2.45805	2.84875	8.22052	0.214
D10	2018-09-28	N	-8.12154	2.45271	0.389646	1.72265	83.471	1.0205	2.45805	2.84875	8.22052	0.214
D10	2018-09-28	N	-7.50498	2.26651	0.355357	1.72265	83.471	1.0205	2.45805	2.84875	8.22052	0.214
D10	2018-09-28	N	-7.48622	2.26084	0.35427	1.72265	83.471	1.0205	2.45805	2.84875	8.22052	0.214
D10	2018-09-28	N	-9.17297	2.77024	0.442517	1.72265	83.471	1.0205	2.45805	2.84875	8.22052	0.214
D10	2018-09-28	P	-4.39943	1.32863	0.123404	1.72265	83.471	1.0205	2.45805	2.84875	8.22052	0.214
D10	2018-09-28	P	-4.93547	1.49051	0.173336	1.72265	83.471	1.0205	2.45805	2.84875	8.22052	0.214
D10	2018-09-28	P	-5.30093	1.60088	0.20436	1.72265	83.471	1.0205	2.45805	2.84875	8.22052	0.214
D10	2018-09-28	P	-4.95347	1.49595	0.174917	1.72265	83.471	1.0205	2.45805	2.84875	8.22052	0.214
D10	2018-09-28	P	-5.6942	1.71965	0.23544	1.72265	83.471	1.0205	2.45805	2.84875	8.22052	0.214
D10	2018-09-28	NP	-12.1088	3.65686	0.563108	1.72265	83.471	1.0205	2.45805	2.84875	8.22052	0.214
D10	2018-09-28	NP	-12.6762	3.82823	0.582998	1.72265	83.471	1.0205	2.45805	2.84875	8.22052	0.214
D10	2018-09-28	NP	-11.865	3.58323	0.554275	1.72265	83.471	1.0205	2.45805	2.84875	8.22052	0.214
D10	2018-09-28	NP	-11.8199	3.56962	0.552621	1.72265	83.471	1.0205	2.45805	2.84875	8.22052	0.214
D10	2018-09-28	NP	-12.6657	3.82503	0.582635	1.72265	83.471	1.0205	2.45805	2.84875	8.22052	0.214
D10	2018-09-28	C	-5.23882	1.58213	0.199241	1.72265	83.471	1.0205	2.45805	2.84875	8.22052	0.214
D10	2018-09-28	C	-5.64279	1.70413	0.231502	1.72265	83.471	1.0205	2.45805	2.84875	8.22052	0.214
D10	2018-09-28	C	-4.86548	1.46938	0.167134	1.72265	83.471	1.0205	2.45805	2.84875	8.22052	0.214
D10	2018-09-28	C	-4.72831	1.42795	0.154714	1.72265	83.471	1.0205	2.45805	2.84875	8.22052	0.214
D10	2018-09-28	C	-5.37524	1.62333	0.210406	1.72265	83.471	1.0205	2.45805	2.84875	8.22052	0.214
D10	2018-09-28	CNP	-15.2754	4.61318	0.664	1.72265	83.471	1.0205	2.45805	2.84875	8.22052	0.214
D10	2018-09-28	CNP	-14.9438	4.51302	0.654468	1.72265	83.471	1.0205	2.45805	2.84875	8.22052	0.214
D10	2018-09-28	CNP	-14.2318	4.298	0.633267	1.72265	83.471	1.0205	2.45805	2.84875	8.22052	0.214
D10	2018-09-28	CNP	-14.2793	4.31237	0.634716	1.72265	83.471	1.0205	2.45805	2.84875	8.22052	0.214
D10	2018-09-28	CNP	-15.06	4.54812	0.657832	1.72265	83.471	1.0205	2.45805	2.84875	8.22052	0.214

## Sheet: Data explanation
Column			Explanation	Unit
Deployment			Deployment number (10 in total)	NA
Date			End-date of NDS deployment	dd/mm/yyyy
Treatment			Type of NDS treatment* with n = 5 replicates	A,N,P,NP,C,CNP
Chla			Chl-a accrual on ceramic disc	µg cm-2
Chla.RR			Response ratio = Treatment/Control	NA
	GPP		Oxygen production during incubation	µg O2 cm-2 h-1
	GPP.RR		Response ratio = Treatment/Control	NA
		Respiration	Oxygen consumption during incubation	µg O2 cm-2 h-1
		Res.RR	Response ratio = Treatment/Control	NA
log(RRx)			Log-transformed response ratio.	NA
DOC			Dissolved organic carbon, average of sampling at begin and end of deployment	mg/L
DIN			Dissolved inorganic carbon	µg/L
SRP			Soluable reactive phosphorous	µg/L
TP			Total phsophorous	µg/L
DPF			Daily photon flux	mol m-2 d-1
meanT			Average temperature over deployment period	°C
Depth			Stream depth at NDS-Placement and Pick-up	m
*types of treatment: A = Control, N = Nitrogen, P = Phosphorous, NP = Nitrogen+Phosphorous, C = Carbon and CNP = Carbon+Nitrogen+Phosphorous
