# Supplementary material for: Spatial and temporal patterns of stream nutrient limitation in an Arctic catchment
Source: Springer Nature journal article supplement (doi:10.1007/s10750-023-05178-7), 2023-03-13
Supplement: 10750_2023_5178_MOESM10_ESM.xlsx [file 10750_2023_5178_MOESM10_ESM.xlsx]

## Sheet: Chl a, water chem, etc.
ID	Date	Treatment	Vegetation	Chla	Chla.RR	log(RR)	DOC	DIN	SRP	DPF	meanTemp
6A	2018-08-06	A	Tundra	0.326357	1	0	1.35936	37.3955	0.21	24.0256	11.075
6A	2018-08-06	A	Tundra	1.13137	1	0	1.35936	37.3955	0.21	24.0256	11.075
6A	2018-08-06	A	Tundra	0.620078	1	0	1.35936	37.3955	0.21	24.0256	11.075
6A	2018-08-06	A	Tundra	0.565685	1	0	1.35936	37.3955	0.21	24.0256	11.075
6A	2018-08-06	N	Tundra	0.522171	0.790123	-0.102305	1.35936	37.3955	0.21	24.0256	11.075
6A	2018-08-06	N	Tundra	0.163178	0.246914	-0.607455	1.35936	37.3955	0.21	24.0256	11.075
6A	2018-08-06	N	Tundra	1.25103	1.893	0.277152	1.35936	37.3955	0.21	24.0256	11.075
6A	2018-08-06	N	Tundra	1.22928	1.86008	0.269532	1.35936	37.3955	0.21	24.0256	11.075
6A	2018-08-06	P	Tundra	0.805013	1.21811	0.0856854	1.35936	37.3955	0.21	24.0256	11.075
6A	2018-08-06	P	Tundra	0.598321	0.90535	-0.0431836	1.35936	37.3955	0.21	24.0256	11.075
6A	2018-08-06	P	Tundra	1.50124	2.2716	0.356333	1.35936	37.3955	0.21	24.0256	11.075
6A	2018-08-06	P	Tundra	1.04434	1.58025	0.198725	1.35936	37.3955	0.21	24.0256	11.075
6A	2018-08-06	NP	Tundra	2.57822	3.90123	0.591202	1.35936	37.3955	0.21	24.0256	11.075
6A	2018-08-06	NP	Tundra	2.62173	3.96708	0.598471	1.35936	37.3955	0.21	24.0256	11.075
6A	2018-08-06	NP	Tundra	7.24512	10.963	1.03993	1.35936	37.3955	0.21	24.0256	11.075
6A	2018-08-06	NP	Tundra	6.07024	9.18519	0.963088	1.35936	37.3955	0.21	24.0256	11.075
6B	2018-08-06	A	Tundra	0.435142	1	0	1.43425	61.9355	0.471	15.7871	9.96219
6B	2018-08-06	A	Tundra	0.674471	1	0	1.43425	61.9355	0.471	15.7871	9.96219
6B	2018-08-06	A	Tundra	0.598321	1	0	1.43425	61.9355	0.471	15.7871	9.96219
6B	2018-08-06	A	Tundra	0.478657	1	0	1.43425	61.9355	0.471	15.7871	9.96219
6B	2018-08-06	N	Tundra	0.630956	0.954733	-0.0201183	1.43425	61.9355	0.471	15.7871	9.96219
6B	2018-08-06	N	Tundra	0.837649	1.26749	0.102944	1.43425	61.9355	0.471	15.7871	9.96219
6B	2018-08-06	N	Tundra	0.97907	1.48148	0.170696	1.43425	61.9355	0.471	15.7871	9.96219
6B	2018-08-06	N	Tundra	0.728863	1.10288	0.0425285	1.43425	61.9355	0.471	15.7871	9.96219
6B	2018-08-06	P	Tundra	0.848528	1.28395	0.108548	1.43425	61.9355	0.471	15.7871	9.96219
6B	2018-08-06	P	Tundra	1.12049	1.69547	0.229291	1.43425	61.9355	0.471	15.7871	9.96219
6B	2018-08-06	P	Tundra	0.630956	0.954733	-0.0201183	1.43425	61.9355	0.471	15.7871	9.96219
6B	2018-08-06	P	Tundra	1.13137	1.71193	0.233487	1.43425	61.9355	0.471	15.7871	9.96219
6B	2018-08-06	NP	Tundra	2.96985	4.49383	0.652616	1.43425	61.9355	0.471	15.7871	9.96219
6B	2018-08-06	NP	Tundra	3.9598	5.99177	0.777555	1.43425	61.9355	0.471	15.7871	9.96219
6B	2018-08-06	NP	Tundra	4.72129	7.14403	0.853943	1.43425	61.9355	0.471	15.7871	9.96219
6B	2018-08-06	NP	Tundra	5.55894	8.41152	0.924875	1.43425	61.9355	0.471	15.7871	9.96219
6C	2018-08-06	A	Tundra	0.38075	1	0	1.91792	18.5925	13.166	21.9167	10.4547
6C	2018-08-06	A	Tundra	0.250207	1	0	1.91792	18.5925	13.166	21.9167	10.4547
6C	2018-08-06	A	Tundra	0.108786	1	0	1.91792	18.5925	13.166	21.9167	10.4547
6C	2018-08-06	A	Tundra	0	1	0	1.91792	18.5925	13.166	21.9167	10.4547
6C	2018-08-06	N	Tundra	1.28367	1.94239	0.288336	1.91792	18.5925	13.166	21.9167	10.4547
6C	2018-08-06	N	Tundra	0.424264	0.641975	-0.192482	1.91792	18.5925	13.166	21.9167	10.4547
6C	2018-08-06	N	Tundra	0.424264	0.641975	-0.192482	1.91792	18.5925	13.166	21.9167	10.4547
6C	2018-08-06	N	Tundra	0.761499	1.15226	0.0615518	1.91792	18.5925	13.166	21.9167	10.4547
6C	2018-08-06	P	Tundra	0.326357	0.493827	-0.306425	1.91792	18.5925	13.166	21.9167	10.4547
6C	2018-08-06	P	Tundra	0.0435142	0.0658436	-1.18149	1.91792	18.5925	13.166	21.9167	10.4547
6C	2018-08-06	P	Tundra	0.435142	0.658436	-0.181486	1.91792	18.5925	13.166	21.9167	10.4547
6C	2018-08-06	P	Tundra	0.326357	0.493827	-0.306425	1.91792	18.5925	13.166	21.9167	10.4547
6C	2018-08-06	NP	Tundra	2.98073	4.51029	0.654204	1.91792	18.5925	13.166	21.9167	10.4547
6C	2018-08-06	NP	Tundra	2.9916	4.52675	0.655786	1.91792	18.5925	13.166	21.9167	10.4547
6C	2018-08-06	NP	Tundra	3.77486	5.71193	0.756783	1.91792	18.5925	13.166	21.9167	10.4547
6C	2018-08-06	NP	Tundra	7.63675	11.5556	1.06279	1.91792	18.5925	13.166	21.9167	10.4547
9A	2018-08-06	A	Tundra	0.261085	1	0	1.61133	41.723	0.7215	18.448	14.8488
9A	2018-08-06	A	Tundra	0.641835	1	0	1.61133	41.723	0.7215	18.448	14.8488
9A	2018-08-06	A	Tundra	0.598321	1	0	1.61133	41.723	0.7215	18.448	14.8488
9A	2018-08-06	A	Tundra	0.696228	1	0	1.61133	41.723	0.7215	18.448	14.8488
9A	2018-08-06	N	Tundra	3.1439	5.72277	0.757606	1.61133	41.723	0.7215	18.448	14.8488
9A	2018-08-06	N	Tundra	2.09956	3.82178	0.582266	1.61133	41.723	0.7215	18.448	14.8488
9A	2018-08-06	N	Tundra	1.55563	2.83168	0.452045	1.61133	41.723	0.7215	18.448	14.8488
9A	2018-08-06	N	Tundra	1.51212	2.75248	0.439723	1.61133	41.723	0.7215	18.448	14.8488
9A	2018-08-06	P	Tundra	0.946435	1.72277	0.236228	1.61133	41.723	0.7215	18.448	14.8488
9A	2018-08-06	P	Tundra	1.46861	2.67327	0.427042	1.61133	41.723	0.7215	18.448	14.8488
9A	2018-08-06	P	Tundra	1.34894	2.45545	0.39013	1.61133	41.723	0.7215	18.448	14.8488
9A	2018-08-06	P	Tundra	2.03429	3.70297	0.56855	1.61133	41.723	0.7215	18.448	14.8488
9A	2018-08-06	NP	Tundra	6.84261	12.4554	1.09536	1.61133	41.723	0.7215	18.448	14.8488
9A	2018-08-06	NP	Tundra	4.44933	8.09901	0.908432	1.61133	41.723	0.7215	18.448	14.8488
9A	2018-08-06	NP	Tundra	8.21331	14.9505	1.17466	1.61133	41.723	0.7215	18.448	14.8488
9A	2018-08-06	NP	Tundra	4.73217	8.61386	0.935198	1.61133	41.723	0.7215	18.448	14.8488
9B	2018-08-06	A	Tundra	0.652714	1	0	1.47797	32.603	0.786	22.9412	15.0977
9B	2018-08-06	A	Tundra	0.565685	1	0	1.47797	32.603	0.786	22.9412	15.0977
9B	2018-08-06	A	Tundra	0.620078	1	0	1.47797	32.603	0.786	22.9412	15.0977
9B	2018-08-06	A	Tundra	0.630956	1	0	1.47797	32.603	0.786	22.9412	15.0977
9B	2018-08-06	N	Tundra	0.82677	1.50495	0.177522	1.47797	32.603	0.786	22.9412	15.0977
9B	2018-08-06	N	Tundra	0.761499	1.38614	0.141807	1.47797	32.603	0.786	22.9412	15.0977
9B	2018-08-06	N	Tundra	1.10961	2.0198	0.305309	1.47797	32.603	0.786	22.9412	15.0977
9B	2018-08-06	N	Tundra	1.84935	3.36634	0.527158	1.47797	32.603	0.786	22.9412	15.0977
9B	2018-08-06	P	Tundra	1.27279	2.31683	0.364894	1.47797	32.603	0.786	22.9412	15.0977
9B	2018-08-06	P	Tundra	1.94726	3.54455	0.549562	1.47797	32.603	0.786	22.9412	15.0977
9B	2018-08-06	P	Tundra	1.29455	2.35644	0.372256	1.47797	32.603	0.786	22.9412	15.0977
9B	2018-08-06	P	Tundra	1.65354	3.0099	0.478552	1.47797	32.603	0.786	22.9412	15.0977
9B	2018-08-06	NP	Tundra	3.6552	6.65347	0.823048	1.47797	32.603	0.786	22.9412	15.0977
9B	2018-08-06	NP	Tundra	3.16566	5.76238	0.760602	1.47797	32.603	0.786	22.9412	15.0977
9B	2018-08-06	NP	Tundra	5.47192	9.9604	0.998277	1.47797	32.603	0.786	22.9412	15.0977
9B	2018-08-06	NP	Tundra	6.10287	11.1089	1.04567	1.47797	32.603	0.786	22.9412	15.0977
9C	2018-08-06	A	Tundra	0.924677	1	0	1.4438	34.6745	1.0525	19.7765	13.8388
9C	2018-08-06	A	Tundra	0.358992	1	0	1.4438	34.6745	1.0525	19.7765	13.8388
9C	2018-08-06	A	Tundra	1.00083	1	0	1.4438	34.6745	1.0525	19.7765	13.8388
9C	2018-08-06	A	Tundra	0.728863	1	0	1.4438	34.6745	1.0525	19.7765	13.8388
9C	2018-08-06	N	Tundra	1.30543	2.37624	0.37589	1.4438	34.6745	1.0525	19.7765	13.8388
9C	2018-08-06	N	Tundra	1.91463	3.48515	0.542221	1.4438	34.6745	1.0525	19.7765	13.8388
9C	2018-08-06	N	Tundra	0.82677	1.50495	0.177522	1.4438	34.6745	1.0525	19.7765	13.8388
9C	2018-08-06	N	Tundra	1.2184	2.21782	0.345927	1.4438	34.6745	1.0525	19.7765	13.8388
9C	2018-08-06	P	Tundra	1.29455	2.35644	0.372256	1.4438	34.6745	1.0525	19.7765	13.8388
9C	2018-08-06	P	Tundra	1.74057	3.16832	0.500829	1.4438	34.6745	1.0525	19.7765	13.8388
9C	2018-08-06	P	Tundra	1.61003	2.93069	0.46697	1.4438	34.6745	1.0525	19.7765	13.8388
9C	2018-08-06	P	Tundra	3.45938	6.29703	0.799136	1.4438	34.6745	1.0525	19.7765	13.8388
9C	2018-08-06	NP	Tundra	4.98238	9.06931	0.957574	1.4438	34.6745	1.0525	19.7765	13.8388
9C	2018-08-06	NP	Tundra	6.51626	11.8614	1.07414	1.4438	34.6745	1.0525	19.7765	13.8388
9C	2018-08-06	NP	Tundra	7.28863	13.2673	1.12278	1.4438	34.6745	1.0525	19.7765	13.8388
9C	2018-08-06	NP	Tundra	7.90871	14.396	1.15824	1.4438	34.6745	1.0525	19.7765	13.8388
10A	2018-08-06	A	Tundra	0.271964	1	0	1.25923	5.981	0.2825	16.0442	12.3743
10A	2018-08-06	A	Tundra	0.261085	1	0	1.25923	5.981	0.2825	16.0442	12.3743
10A	2018-08-06	A	Tundra	0.38075	1	0	1.25923	5.981	0.2825	16.0442	12.3743
10A	2018-08-06	A	Tundra	0.446021	1	0	1.25923	5.981	0.2825	16.0442	12.3743
10A	2018-08-06	N	Tundra	1.24016	3.648	0.562055	1.25923	5.981	0.2825	16.0442	12.3743
10A	2018-08-06	N	Tundra	1.77321	5.216	0.717338	1.25923	5.981	0.2825	16.0442	12.3743
10A	2018-08-06	N	Tundra	1.70793	5.024	0.70105	1.25923	5.981	0.2825	16.0442	12.3743
10A	2018-08-06	N	Tundra	1.49036	4.384	0.641871	1.25923	5.981	0.2825	16.0442	12.3743
10A	2018-08-06	P	Tundra	0.576564	1.696	0.229426	1.25923	5.981	0.2825	16.0442	12.3743
10A	2018-08-06	P	Tundra	0.598321	1.76	0.245513	1.25923	5.981	0.2825	16.0442	12.3743
10A	2018-08-06	P	Tundra	0.446021	1.312	0.117934	1.25923	5.981	0.2825	16.0442	12.3743
10A	2018-08-06	P	Tundra	0.467778	1.376	0.138618	1.25923	5.981	0.2825	16.0442	12.3743
10A	2018-08-06	NP	Tundra	3.56817	10.496	1.02102	1.25923	5.981	0.2825	16.0442	12.3743
10A	2018-08-06	NP	Tundra	3.66607	10.784	1.03278	1.25923	5.981	0.2825	16.0442	12.3743
10A	2018-08-06	NP	Tundra	6.02672	17.728	1.24866	1.25923	5.981	0.2825	16.0442	12.3743
10A	2018-08-06	NP	Tundra	5.48279	16.128	1.20758	1.25923	5.981	0.2825	16.0442	12.3743
10B	2018-08-06	A	Tundra	0.239328	1	0	1.31345	8.7005	0.5045	27.7766	12.8084
10B	2018-08-06	A	Tundra	0.155926	1	0	1.31345	8.7005	0.5045	27.7766	12.8084
10B	2018-08-06	A	Tundra	0.097907	1	0	1.31345	8.7005	0.5045	27.7766	12.8084
10B	2018-08-06	A	Tundra	0.130543	1	0	1.31345	8.7005	0.5045	27.7766	12.8084
10B	2018-08-06	N	Tundra	0.957313	2.816	0.449633	1.31345	8.7005	0.5045	27.7766	12.8084
10B	2018-08-06	N	Tundra	1.2184	3.584	0.554368	1.31345	8.7005	0.5045	27.7766	12.8084
10B	2018-08-06	N	Tundra	0.989949	2.912	0.464191	1.31345	8.7005	0.5045	27.7766	12.8084
10B	2018-08-06	N	Tundra	0.663592	1.952	0.29048	1.31345	8.7005	0.5045	27.7766	12.8084
10B	2018-08-06	P	Tundra	0.369871	1.088	0.0366289	1.31345	8.7005	0.5045	27.7766	12.8084
10B	2018-08-06	P	Tundra	0.358992	1.056	0.0236639	1.31345	8.7005	0.5045	27.7766	12.8084
10B	2018-08-06	P	Tundra	0.250207	0.736	-0.133122	1.31345	8.7005	0.5045	27.7766	12.8084
10B	2018-08-06	P	Tundra	0.500414	1.472	0.167908	1.31345	8.7005	0.5045	27.7766	12.8084
10B	2018-08-06	NP	Tundra	4.47109	13.152	1.11899	1.31345	8.7005	0.5045	27.7766	12.8084
10B	2018-08-06	NP	Tundra	4.06858	11.968	1.07802	1.31345	8.7005	0.5045	27.7766	12.8084
10B	2018-08-06	NP	Tundra	3.47026	10.208	1.00894	1.31345	8.7005	0.5045	27.7766	12.8084
10B	2018-08-06	NP	Tundra	5.04765	14.848	1.17167	1.31345	8.7005	0.5045	27.7766	12.8084
10C	2018-08-06	A	Tundra	0.0435142	1	0	1.24152	9.9835	6.214	21.9706	13.3366
10C	2018-08-06	A	Tundra	0.0652714	1	0	1.24152	9.9835	6.214	21.9706	13.3366
10C	2018-08-06	A	Tundra	0.108786	1	0	1.24152	9.9835	6.214	21.9706	13.3366
10C	2018-08-06	A	Tundra	0.217571	1	0	1.24152	9.9835	6.214	21.9706	13.3366
10C	2018-08-06	N	Tundra	1.13137	3.328	0.522183	1.24152	9.9835	6.214	21.9706	13.3366
10C	2018-08-06	N	Tundra	0.989949	2.912	0.464191	1.24152	9.9835	6.214	21.9706	13.3366
10C	2018-08-06	N	Tundra	0.728863	2.144	0.331225	1.24152	9.9835	6.214	21.9706	13.3366
10C	2018-08-06	N	Tundra	0.522171	1.536	0.186391	1.24152	9.9835	6.214	21.9706	13.3366
10C	2018-08-06	P	Tundra	0.522171	1.536	0.186391	1.24152	9.9835	6.214	21.9706	13.3366
10C	2018-08-06	P	Tundra	0.108786	0.32	-0.49485	1.24152	9.9835	6.214	21.9706	13.3366
10C	2018-08-06	P	Tundra	0.326357	0.96	-0.0177288	1.24152	9.9835	6.214	21.9706	13.3366
10C	2018-08-06	P	Tundra	0.22845	0.672	-0.172631	1.24152	9.9835	6.214	21.9706	13.3366
10C	2018-08-06	NP	Tundra	6.12463	18.016	1.25566	1.24152	9.9835	6.214	21.9706	13.3366
10C	2018-08-06	NP	Tundra	4.44933	13.088	1.11687	1.24152	9.9835	6.214	21.9706	13.3366
10C	2018-08-06	NP	Tundra	5.26522	15.488	1.19	1.24152	9.9835	6.214	21.9706	13.3366
10C	2018-08-06	NP	Tundra	4.07946	12	1.07918	1.24152	9.9835	6.214	21.9706	13.3366
18A	2018-08-07	A	Birch forest	1.10961	1	0	1.19636	58.259	0.972	12.4386	7.11418
18A	2018-08-07	A	Birch forest	0.924677	1	0	1.19636	58.259	0.972	12.4386	7.11418
18A	2018-08-07	A	Birch forest	0.620078	1	0	1.19636	58.259	0.972	12.4386	7.11418
18A	2018-08-07	A	Birch forest	0.761499	1	0	1.19636	58.259	0.972	12.4386	7.11418
18A	2018-08-07	N	Birch forest	1.05522	1.23567	0.0919021	1.19636	58.259	0.972	12.4386	7.11418
18A	2018-08-07	N	Birch forest	1.16401	1.36306	0.134514	1.19636	58.259	0.972	12.4386	7.11418
18A	2018-08-07	N	Birch forest	0.696228	0.815287	-0.0886897	1.19636	58.259	0.972	12.4386	7.11418
18A	2018-08-07	N	Birch forest	1.12049	1.3121	0.117968	1.19636	58.259	0.972	12.4386	7.11418
18A	2018-08-07	P	Birch forest	1.75145	2.05096	0.311956	1.19636	58.259	0.972	12.4386	7.11418
18A	2018-08-07	P	Birch forest	1.29455	1.51592	0.180677	1.19636	58.259	0.972	12.4386	7.11418
18A	2018-08-07	P	Birch forest	1.16401	1.36306	0.134514	1.19636	58.259	0.972	12.4386	7.11418
18A	2018-08-07	P	Birch forest	0.848528	0.993631	-0.00277505	1.19636	58.259	0.972	12.4386	7.11418
18A	2018-08-07	NP	Birch forest	7.95223	9.3121	0.969048	1.19636	58.259	0.972	12.4386	7.11418
18A	2018-08-07	NP	Birch forest	5.72212	6.70064	0.826116	1.19636	58.259	0.972	12.4386	7.11418
18A	2018-08-07	NP	Birch forest	5.64597	6.61146	0.820298	1.19636	58.259	0.972	12.4386	7.11418
18A	2018-08-07	NP	Birch forest	4.63427	5.42675	0.73454	1.19636	58.259	0.972	12.4386	7.11418
18B	2018-08-07	A	Birch forest	1.38158	1	0	1.10605	55.5095	0.6545	8.28558	7.26331
18B	2018-08-07	A	Birch forest	1.56651	1	0	1.10605	55.5095	0.6545	8.28558	7.26331
18B	2018-08-07	A	Birch forest	0.739742	1	0	1.10605	55.5095	0.6545	8.28558	7.26331
18B	2018-08-07	A	Birch forest	0.805013	1	0	1.10605	55.5095	0.6545	8.28558	7.26331
18B	2018-08-07	N	Birch forest	1.69706	1.98726	0.298255	1.10605	55.5095	0.6545	8.28558	7.26331
18B	2018-08-07	N	Birch forest	1.26191	1.47771	0.169588	1.10605	55.5095	0.6545	8.28558	7.26331
18B	2018-08-07	N	Birch forest	1.28367	1.50318	0.177012	1.10605	55.5095	0.6545	8.28558	7.26331
18B	2018-08-07	N	Birch forest	1.93638	2.26752	0.35555	1.10605	55.5095	0.6545	8.28558	7.26331
18B	2018-08-07	P	Birch forest	1.69706	1.98726	0.298255	1.10605	55.5095	0.6545	8.28558	7.26331
18B	2018-08-07	P	Birch forest	2.08868	2.44586	0.388432	1.10605	55.5095	0.6545	8.28558	7.26331
18B	2018-08-07	P	Birch forest	1.88199	2.20382	0.343176	1.10605	55.5095	0.6545	8.28558	7.26331
18B	2018-08-07	P	Birch forest	2.75228	3.22293	0.508251	1.10605	55.5095	0.6545	8.28558	7.26331
18B	2018-08-07	NP	Birch forest	4.23176	4.95541	0.69508	1.10605	55.5095	0.6545	8.28558	7.26331
18B	2018-08-07	NP	Birch forest	4.79744	5.61783	0.749569	1.10605	55.5095	0.6545	8.28558	7.26331
18B	2018-08-07	NP	Birch forest	4.75393	5.56688	0.745612	1.10605	55.5095	0.6545	8.28558	7.26331
18B	2018-08-07	NP	Birch forest	4.75393	5.56688	0.745612	1.10605	55.5095	0.6545	8.28558	7.26331
18C	2018-08-07	A	Birch forest	1.2184	1	0	1.1291	55.498	0.804	7.2229	7.22225
18C	2018-08-07	A	Birch forest	1.16401	1	0	1.1291	55.498	0.804	7.2229	7.22225
18C	2018-08-07	A	Birch forest	1.19664	1	0	1.1291	55.498	0.804	7.2229	7.22225
18C	2018-08-07	A	Birch forest	0.924677	1	0	1.1291	55.498	0.804	7.2229	7.22225
18C	2018-08-07	N	Birch forest	1.25103	1.46497	0.165828	1.1291	55.498	0.804	7.2229	7.22225
18C	2018-08-07	N	Birch forest	1.22928	1.43949	0.158209	1.1291	55.498	0.804	7.2229	7.22225
18C	2018-08-07	N	Birch forest	1.80584	2.11465	0.325238	1.1291	55.498	0.804	7.2229	7.22225
18C	2018-08-07	N	Birch forest	1.35982	1.59236	0.20204	1.1291	55.498	0.804	7.2229	7.22225
18C	2018-08-07	P	Birch forest	1.34894	1.57962	0.198552	1.1291	55.498	0.804	7.2229	7.22225
18C	2018-08-07	P	Birch forest	2.16483	2.53503	0.403983	1.1291	55.498	0.804	7.2229	7.22225
18C	2018-08-07	P	Birch forest	2.45855	2.87898	0.459239	1.1291	55.498	0.804	7.2229	7.22225
18C	2018-08-07	P	Birch forest	1.66442	1.94904	0.289822	1.1291	55.498	0.804	7.2229	7.22225
18C	2018-08-07	NP	Birch forest	4.77569	5.59236	0.747595	1.1291	55.498	0.804	7.2229	7.22225
18C	2018-08-07	NP	Birch forest	5.39577	6.31847	0.800612	1.1291	55.498	0.804	7.2229	7.22225
18C	2018-08-07	NP	Birch forest	4.17737	4.89172	0.689462	1.1291	55.498	0.804	7.2229	7.22225
18C	2018-08-07	NP	Birch forest	6.60329	7.73248	0.888319	1.1291	55.498	0.804	7.2229	7.22225
16A	2018-08-07	A	Birch forest	0.805013	1	0	1.13237	86.75	0.499	10.411	4.78973
16A	2018-08-07	A	Birch forest	0.435142	1	0	1.13237	86.75	0.499	10.411	4.78973
16A	2018-08-07	A	Birch forest	1.14225	1	0	1.13237	86.75	0.499	10.411	4.78973
16A	2018-08-07	A	Birch forest	0.206693	1	0	1.13237	86.75	0.499	10.411	4.78973
16A	2018-08-07	N	Birch forest	1.72969	2.67227	0.42688	1.13237	86.75	0.499	10.411	4.78973
16A	2018-08-07	N	Birch forest	0.652714	1.0084	0.00363428	1.13237	86.75	0.499	10.411	4.78973
16A	2018-08-07	N	Birch forest	1.79496	2.77311	0.442967	1.13237	86.75	0.499	10.411	4.78973
16A	2018-08-07	N	Birch forest	0.859406	1.32773	0.12311	1.13237	86.75	0.499	10.411	4.78973
16A	2018-08-07	P	Birch forest	1.3707	2.11765	0.325854	1.13237	86.75	0.499	10.411	4.78973
16A	2018-08-07	P	Birch forest	2.67613	4.13445	0.616418	1.13237	86.75	0.499	10.411	4.78973
16A	2018-08-07	P	Birch forest	2.24098	3.46218	0.53935	1.13237	86.75	0.499	10.411	4.78973
16A	2018-08-07	P	Birch forest	1.27279	1.96639	0.293669	1.13237	86.75	0.499	10.411	4.78973
16A	2018-08-07	NP	Birch forest	3.39411	5.2437	0.719638	1.13237	86.75	0.499	10.411	4.78973
16A	2018-08-07	NP	Birch forest	3.18742	4.92437	0.692351	1.13237	86.75	0.499	10.411	4.78973
16A	2018-08-07	NP	Birch forest	1.04434	1.61345	0.207754	1.13237	86.75	0.499	10.411	4.78973
16A	2018-08-07	NP	Birch forest	2.26274	3.4958	0.543546	1.13237	86.75	0.499	10.411	4.78973
16B	2018-08-07	A	Birch forest	0.968192	1	0	2.43932	75.0605	0.4675	10.9168	7.80678
16B	2018-08-07	A	Birch forest	0.935556	1	0	2.43932	75.0605	0.4675	10.9168	7.80678
16B	2018-08-07	A	Birch forest	0.750621	1	0	2.43932	75.0605	0.4675	10.9168	7.80678
16B	2018-08-07	A	Birch forest	0.446021	1	0	2.43932	75.0605	0.4675	10.9168	7.80678
16B	2018-08-07	N	Birch forest	0.543928	0.840336	-0.075547	2.43932	75.0605	0.4675	10.9168	7.80678
16B	2018-08-07	N	Birch forest	1.79496	2.77311	0.442967	2.43932	75.0605	0.4675	10.9168	7.80678
16B	2018-08-07	N	Birch forest	3.41587	5.27731	0.722413	2.43932	75.0605	0.4675	10.9168	7.80678
16B	2018-08-07	N	Birch forest	0.195814	0.302521	-0.519244	2.43932	75.0605	0.4675	10.9168	7.80678
16B	2018-08-07	P	Birch forest	2.02341	3.12605	0.494996	2.43932	75.0605	0.4675	10.9168	7.80678
16B	2018-08-07	P	Birch forest	1.29455	2	0.30103	2.43932	75.0605	0.4675	10.9168	7.80678
16B	2018-08-07	P	Birch forest	1.42509	2.20168	0.342754	2.43932	75.0605	0.4675	10.9168	7.80678
16B	2018-08-07	P	Birch forest	1.70793	2.63866	0.421383	2.43932	75.0605	0.4675	10.9168	7.80678
16B	2018-08-07	NP	Birch forest	6.32044	9.76471	0.989659	2.43932	75.0605	0.4675	10.9168	7.80678
16B	2018-08-07	NP	Birch forest	7.20161	11.1261	1.04634	2.43932	75.0605	0.4675	10.9168	7.80678
16B	2018-08-07	NP	Birch forest	5.86354	9.05882	0.957072	2.43932	75.0605	0.4675	10.9168	7.80678
16B	2018-08-07	NP	Birch forest	5.64597	8.72269	0.94065	2.43932	75.0605	0.4675	10.9168	7.80678
16C	2018-08-07	A	Birch forest	1.05522	1	0	1.9476	72.4855	2.0605	8.82658	6.8621
16C	2018-08-07	A	Birch forest	1.27279	1	0	1.9476	72.4855	2.0605	8.82658	6.8621
16C	2018-08-07	A	Birch forest	0.913799	1	0	1.9476	72.4855	2.0605	8.82658	6.8621
16C	2018-08-07	A	Birch forest	0.337235	1	0	1.9476	72.4855	2.0605	8.82658	6.8621
16C	2018-08-07	N	Birch forest	0.924677	1.42857	0.154902	1.9476	72.4855	2.0605	8.82658	6.8621
16C	2018-08-07	N	Birch forest	0.913799	1.41176	0.149762	1.9476	72.4855	2.0605	8.82658	6.8621
16C	2018-08-07	N	Birch forest	1.33806	2.06723	0.315388	1.9476	72.4855	2.0605	8.82658	6.8621
16C	2018-08-07	N	Birch forest	0.587442	0.907563	-0.0421232	1.9476	72.4855	2.0605	8.82658	6.8621
16C	2018-08-07	P	Birch forest	7.15809	11.0588	1.04371	1.9476	72.4855	2.0605	8.82658	6.8621
16C	2018-08-07	P	Birch forest	2.5891	4	0.60206	1.9476	72.4855	2.0605	8.82658	6.8621
16C	2018-08-07	P	Birch forest	1.78408	2.7563	0.440327	1.9476	72.4855	2.0605	8.82658	6.8621
16C	2018-08-07	P	Birch forest	1.75145	2.70588	0.432309	1.9476	72.4855	2.0605	8.82658	6.8621
16C	2018-08-07	NP	Birch forest	4.96062	7.66387	0.884448	1.9476	72.4855	2.0605	8.82658	6.8621
16C	2018-08-07	NP	Birch forest	4.76481	7.36134	0.866957	1.9476	72.4855	2.0605	8.82658	6.8621
16C	2018-08-07	NP	Birch forest	5.31962	8.21849	0.914792	1.9476	72.4855	2.0605	8.82658	6.8621
16C	2018-08-07	NP	Birch forest	5.04765	7.79832	0.892001	1.9476	72.4855	2.0605	8.82658	6.8621
16D	2018-08-07	A	Birch forest	1.05522	1	0	1.64763	60.6245	1.4105	9.92629	7.1524
16D	2018-08-07	A	Birch forest	0.685349	1	0	1.64763	60.6245	1.4105	9.92629	7.1524
16D	2018-08-07	A	Birch forest	0.859406	1	0	1.64763	60.6245	1.4105	9.92629	7.1524
16D	2018-08-07	A	Birch forest	0.82677	1	0	1.64763	60.6245	1.4105	9.92629	7.1524
16D	2018-08-07	N	Birch forest	0.859406	1.32773	0.12311	1.64763	60.6245	1.4105	9.92629	7.1524
16D	2018-08-07	N	Birch forest	0.837649	1.29412	0.111974	1.64763	60.6245	1.4105	9.92629	7.1524
16D	2018-08-07	N	Birch forest	0.935556	1.44538	0.159981	1.64763	60.6245	1.4105	9.92629	7.1524
16D	2018-08-07	N	Birch forest	1.19664	1.84874	0.266876	1.64763	60.6245	1.4105	9.92629	7.1524
16D	2018-08-07	P	Birch forest	1.70793	2.63866	0.421383	1.64763	60.6245	1.4105	9.92629	7.1524
16D	2018-08-07	P	Birch forest	1.53388	2.36975	0.374702	1.64763	60.6245	1.4105	9.92629	7.1524
16D	2018-08-07	P	Birch forest	2.02341	3.12605	0.494996	1.64763	60.6245	1.4105	9.92629	7.1524
16D	2018-08-07	P	Birch forest	1.9255	2.97479	0.473456	1.64763	60.6245	1.4105	9.92629	7.1524
16D	2018-08-07	NP	Birch forest	5.28698	8.16807	0.912119	1.64763	60.6245	1.4105	9.92629	7.1524
16D	2018-08-07	NP	Birch forest	5.43928	8.40336	0.924453	1.64763	60.6245	1.4105	9.92629	7.1524
16D	2018-08-07	NP	Birch forest	8.51791	13.1597	1.11924	1.64763	60.6245	1.4105	9.92629	7.1524
16D	2018-08-07	NP	Birch forest	6.05936	9.36134	0.971338	1.64763	60.6245	1.4105	9.92629	7.1524
16E	2018-08-07	A	Birch forest	1.51212	1	0	1.43814	61.4905	0.47	8.90785	6.98801
16E	2018-08-07	A	Birch forest	1.03346	1	0	1.43814	61.4905	0.47	8.90785	6.98801
16E	2018-08-07	A	Birch forest	0.446021	1	0	1.43814	61.4905	0.47	8.90785	6.98801
16E	2018-08-07	A	Birch forest	0.90292	1	0	1.43814	61.4905	0.47	8.90785	6.98801
16E	2018-08-07	N	Birch forest	1.56651	2.42017	0.383846	1.43814	61.4905	0.47	8.90785	6.98801
16E	2018-08-07	N	Birch forest	1.19664	1.84874	0.266876	1.43814	61.4905	0.47	8.90785	6.98801
16E	2018-08-07	N	Birch forest	1.30543	2.01681	0.304664	1.43814	61.4905	0.47	8.90785	6.98801
16E	2018-08-07	N	Birch forest	2.42592	3.7479	0.573788	1.43814	61.4905	0.47	8.90785	6.98801
16E	2018-08-07	P	Birch forest	2.3824	3.68067	0.565927	1.43814	61.4905	0.47	8.90785	6.98801
16E	2018-08-07	P	Birch forest	1.62091	2.5042	0.398669	1.43814	61.4905	0.47	8.90785	6.98801
16E	2018-08-07	P	Birch forest	1.54476	2.38655	0.377771	1.43814	61.4905	0.47	8.90785	6.98801
16E	2018-08-07	P	Birch forest	1.9255	2.97479	0.473456	1.43814	61.4905	0.47	8.90785	6.98801
16E	2018-08-07	NP	Birch forest	5.51543	8.52101	0.930491	1.43814	61.4905	0.47	8.90785	6.98801
16E	2018-08-07	NP	Birch forest	4.8192	7.44538	0.871887	1.43814	61.4905	0.47	8.90785	6.98801
16E	2018-08-07	NP	Birch forest	4.53636	7.0084	0.845619	1.43814	61.4905	0.47	8.90785	6.98801
16E	2018-08-07	NP	Birch forest	4.12297	6.36975	0.804122	1.43814	61.4905	0.47	8.90785	6.98801
2	2018-08-07	A	Mixed	1.01171	1	0	1.96232	46.6085	1.027	11.697	13.2496
2	2018-08-07	A	Mixed	1.27279	1	0	1.96232	46.6085	1.027	11.697	13.2496
2	2018-08-07	A	Mixed	1.00083	1	0	1.96232	46.6085	1.027	11.697	13.2496
2	2018-08-07	A	Mixed	1.44685	1	0	1.96232	46.6085	1.027	11.697	13.2496
2	2018-08-07	N	Mixed	3.25269	2.74943	0.439242	1.96232	46.6085	1.027	11.697	13.2496
2	2018-08-07	N	Mixed	2.82843	2.3908	0.378544	1.96232	46.6085	1.027	11.697	13.2496
2	2018-08-07	N	Mixed	1.53388	1.29655	0.11279	1.96232	46.6085	1.027	11.697	13.2496
2	2018-08-07	N	Mixed	2.34977	1.98621	0.298024	1.96232	46.6085	1.027	11.697	13.2496
2	2018-08-07	P	Mixed	1.69706	1.43448	0.156695	1.96232	46.6085	1.027	11.697	13.2496
2	2018-08-07	P	Mixed	1.83848	1.55402	0.191457	1.96232	46.6085	1.027	11.697	13.2496
2	2018-08-07	P	Mixed	2.30625	1.94943	0.289907	1.96232	46.6085	1.027	11.697	13.2496
2	2018-08-07	P	Mixed	1.12049	0.947126	-0.023592	1.96232	46.6085	1.027	11.697	13.2496
2	2018-08-07	NP	Mixed	7.46269	6.30805	0.799895	1.96232	46.6085	1.027	11.697	13.2496
2	2018-08-07	NP	Mixed	6.00496	5.07586	0.70551	1.96232	46.6085	1.027	11.697	13.2496
2	2018-08-07	NP	Mixed	8.35473	7.06207	0.848932	1.96232	46.6085	1.027	11.697	13.2496
2	2018-08-07	NP	Mixed	7.46269	6.30805	0.799895	1.96232	46.6085	1.027	11.697	13.2496
3	2018-08-07	A	Mixed	0.326357	1	0	2.12267	43.3185	4.884	13.3652	10.5544
3	2018-08-07	A	Mixed	0.511292	1	0	2.12267	43.3185	4.884	13.3652	10.5544
3	2018-08-07	A	Mixed	0.478657	1	0	2.12267	43.3185	4.884	13.3652	10.5544
3	2018-08-07	A	Mixed	0.609199	1	0	2.12267	43.3185	4.884	13.3652	10.5544
3	2018-08-07	N	Mixed	1.02258	0.864368	-0.0633014	2.12267	43.3185	4.884	13.3652	10.5544
3	2018-08-07	N	Mixed	0.565685	0.478161	-0.320426	2.12267	43.3185	4.884	13.3652	10.5544
3	2018-08-07	N	Mixed	0.815892	0.689655	-0.161368	2.12267	43.3185	4.884	13.3652	10.5544
3	2018-08-07	N	Mixed	0.848528	0.717241	-0.144335	2.12267	43.3185	4.884	13.3652	10.5544
3	2018-08-07	P	Mixed	0.946435	0.8	-0.09691	2.12267	43.3185	4.884	13.3652	10.5544
3	2018-08-07	P	Mixed	1.49036	1.25977	0.100291	2.12267	43.3185	4.884	13.3652	10.5544
3	2018-08-07	P	Mixed	0.90292	0.763218	-0.117351	2.12267	43.3185	4.884	13.3652	10.5544
3	2018-08-07	P	Mixed	1.05522	0.891954	-0.0496575	2.12267	43.3185	4.884	13.3652	10.5544
3	2018-08-07	NP	Mixed	4.73217	4	0.60206	2.12267	43.3185	4.884	13.3652	10.5544
3	2018-08-07	NP	Mixed	3.37235	2.85057	0.454932	2.12267	43.3185	4.884	13.3652	10.5544
3	2018-08-07	NP	Mixed	4.80832	4.06437	0.608993	2.12267	43.3185	4.884	13.3652	10.5544
3	2018-08-07	NP	Mixed	4.0577	3.42989	0.53528	2.12267	43.3185	4.884	13.3652	10.5544
19	2018-08-07	A	Mixed	0.358992	1	0	1.35927	30.634	2.325	13.2943	12.9399
19	2018-08-07	A	Mixed	0.565685	1	0	1.35927	30.634	2.325	13.2943	12.9399
19	2018-08-07	A	Mixed	0.282843	1	0	1.35927	30.634	2.325	13.2943	12.9399
19	2018-08-07	A	Mixed	0.435142	1	0	1.35927	30.634	2.325	13.2943	12.9399
19	2018-08-07	N	Mixed	0.511292	0.432184	-0.364331	1.35927	30.634	2.325	13.2943	12.9399
19	2018-08-07	N	Mixed	1.18576	1.0023	0.000997232	1.35927	30.634	2.325	13.2943	12.9399
19	2018-08-07	N	Mixed	0.467778	0.395402	-0.402961	1.35927	30.634	2.325	13.2943	12.9399
19	2018-08-07	N	Mixed	1.20752	1.02069	0.00889371	1.35927	30.634	2.325	13.2943	12.9399
19	2018-08-07	P	Mixed	0.554806	0.468966	-0.328859	1.35927	30.634	2.325	13.2943	12.9399
19	2018-08-07	P	Mixed	0.859406	0.726437	-0.138802	1.35927	30.634	2.325	13.2943	12.9399
19	2018-08-07	P	Mixed	0.805013	0.68046	-0.167198	1.35927	30.634	2.325	13.2943	12.9399
19	2018-08-07	P	Mixed	0.674471	0.570115	-0.244038	1.35927	30.634	2.325	13.2943	12.9399
19	2018-08-07	NP	Mixed	2.90458	2.45517	0.390082	1.35927	30.634	2.325	13.2943	12.9399
19	2018-08-07	NP	Mixed	3.33972	2.82299	0.450709	1.35927	30.634	2.325	13.2943	12.9399
19	2018-08-07	NP	Mixed	4.91711	4.15632	0.618709	1.35927	30.634	2.325	13.2943	12.9399
19	2018-08-07	NP	Mixed	3.77486	3.1908	0.5039	1.35927	30.634	2.325	13.2943	12.9399

## Sheet: Data explanation
Column	Explanation	Unit
ID	Site number within Miellajokka catchment	NA
Date	Start-day of deployment	dd/mm/yyyy
Vegetation	Vegetation type* dominating the catchment of the site (ID)	NA
Treatment	Type of NDS treatment** with n = 4 replicates	NA
Chla	Chl-a accrual on ceramic disc	µg cm-2
Chla.RR	Response ratio = Treatment/Control	NA
log(RRx)	Log-transformed response ratio.	NA
DOC	Dissolved organic carbon, average of sampling at begin and end of deployment	mg/L
DIN	Dissolved inorganic carbon	µg/L
SRP	Soluable reactive phosphorous	µg/L
DPF	Daily photon flux	mol m-2 d-1
meanT	Average temperature over deployment period	°C
*types of vegetation: Tundra, Birch forest and Mixed.
**types of treatment: A = Control, N = Nitrogen, P = Phosphorous, NP = Nitrogen+Phosphorous
